# Supplementary material for: Pediatric ultrasound on YouTube: a multicenter quality assessment and ten practical recommendations
Source: Research Square preprint supplement (doi:10.21203/rs.3.rs-6555197/v1), 2025-05-09
Supplement: Supplementary file 1 [file 36ccc19636dc676facd33157.xlsx]

## Sheet: Database
Videos_num	Type_of_Social_Network	Link_videos	Author	Months_from_publication	Channel_subscribed	Video_resolution	Type_of_creator	Purpose	Duration_sec	Views	Likes	Comments	Tot_interactions	Type_of_ultrasound	JAMAS1_Autorship	JAMAS2_Attribution	JAMAS3_Currency	JAMAS4_Disclosure	JAMAS_TOT	PEMAT1_Clear_function	PEMAT2_Colloquial_language	PEMAT3_Medical_terms_explained	PEMAT4_Presence_of_speaker	PEMAT5_Pause_and_subsections	PEMAT6_Subtitles	PEMAT7_Logical_sequences	PEMAT8_Summary	PEMAT9_Text_easy_to_read	PEMAT10_Clear_spoken_words	PEMAT11_Clear_illustrations	PEMAT12_Clear_tables	PEMAT13_General_act	PEMAT14_Directive_act	PEMAT15_Stepwise_act	PEMAT16_Visual_act	TOT_PEMAT_Understandability	TOT_PEMAT_Actionability	DISCERN1_Explicit_aims	DISCERN2_Aims_achieved	DISCERN3_Relevance_to_patients	DISCERN4_Source	DISCERN5_Currency	DISCERN6_Bias_and_balance	DISCERN7_Additional_sources	DISCERN8_References_of_uncertainty	DISCERN9_How_procedure_works	DISCERN10_Benefits_of_procedure	DISCERN11_Risks_of_procedure	DISCERN12_No_procedure_options
1	0	Pyloric Ultrasound - YouTube	Sonography Tendencie	88	65500	720	7	7	602	77205	1259	37	1296	2	1	0	1	1	3	1	1	1	1	1	0	1	0	1	1	1	1	1	1	1	1	83.33	100	5	5	1	4	3	5	1	4	4	5	1	3
2	0	https://youtu.be/gVImCagrhfM?si=wUVTTl55LHqADwb8	radiologyassistant	89	15300	720	1	1	41	71133	427	2	429	0	1	0	1	1	3	1	0	0	0			1			0	1		1	0	1		25	50	3	3	1	3	3	3	1	1	1	1	1	1
3	0	https://youtu.be/yxMWQ45g3kw?si=LBLs84VpYMClTTIy	radiologyassistant	65	15300	720	1	1	39	67687	298	9	307	0	1	0	1	1	3	0	0	0	0		1	1		1	0			1	0	0		25	33.33	3	3	1	3	3	3	1	1	1	1	1	1
4	0	https://youtu.be/dXXlZLaOO5g?si=v12kZofQPogUMn1x	formedicalsonographyprofessional	15	732	480	7	7	17	588	1	0	1	2	1	0	1	1	3	0	0	0	0			0			0			1	0	0		0	25	3	2	1	3	5	3	1	1	1	1	1	1
5	0	https://youtu.be/Lue64bE5Rtg?si=TmwpSiyqLUp_PGA9	radiologyvideo	88	102000	240	0	0	2032	61113	516	11	527	0	1	1	1	1	4	1	1	1	1	1	0	1	0		1	1	1	1	1	1	1	75	100	5	5	1	5	3	5	5	5	4	4	1	1
6	0	https://youtu.be/cBf5pQyWB0Q?si=_WtrDccLRiGLAla5	ACMCEMresidency	139	951	480	7	7	678	60549	313	3	316	2	1	1	1	1	4	1	1	1	1	1	0	1	0	1	1	1	1	1	1	1	1	83.33	100	4	4	1	5	1	5	1	3	4	5	1	1
7	0	https://youtu.be/ODF8ZLr_52s?si=0t6m8Htsnff0pbBZ	drsamsimaginglibrary	15	76500	720	1	1	413	61765	1280	63	1343	2	1	0	1	1	3	1	1	1	1	0	0	1	0		1	1		1	1	0		58.33	50	3	3	1	3	5	3	1	1	4	1	1	1
8	0	https://youtu.be/A3akbgBKmcw?si=EPoo_0bpshZ4P_uZ	drsamsimaginglibrary	16	76500	720	1	1	164	51800	730	64	794	2	1	0	1	1	3	1	1	1	1	0	1	0	0	1	1	1		1	1	0		66.67	50	5	5	1	4	5	3	1	1	4	1	1	1
9	0	https://youtu.be/Y8fDm0K0Vww?si=Ibq9475vLFHzjfX3	AIUMultrasound	1456	30800	360	1	1	956	30053	225	3	228	2	1	0	1	1	3	1	1	1	1	1	1	1	0	1	1	1	1	1	1	1	1	91.67	100	5	4	2	4	1	4	1	2	3	3	1	1
10	0	https://youtu.be/vgQhzy-uBNA?si=8	radiologyvideoradiologymadeeasy	88	102000	360	1	1	2059	26882	302	10	312	9	1	1	1	1	4	1	1	1	1	1	1	1	0	1	1	1	1	1	1	1	1	91.67	100	5	5	3	5	3	5	3	5	4	5	1	3
11	0	https://youtu.be/2T8yQ_D-2Yc?si=gBYk0_p2VNxUtfhE	123radiology	23	142000	720	1	1	163	21242	445	20	465	6	1	0	1	1	3	0	1	0	1	0	0	0	0	1	1			1	0	0		33.33	50	5	4	1	4	5	4	1	1	1	4	1	1
12	0	https://youtu.be/b-iCMeCeOdg?si=rXQ2K2ghPUTz3raj	formedicalsonographyprofessional	31	732	480	7	7	18	614	2	0	2	3	1	0	1	1	3	0	0	0	0			0			0			1	0	0		0	25	2	2	1	3	5	3	1	1	1	1	1	1
13	0	https://www.youtube.com/watch?v=lo_NQYPS0Jw	indianradiologist	47	74000	720	1	1	1294	15586	469	27	496	2	1	0	1	1	3	1	1	1	1	1	0	1	0	1	1	1	1	1	0	1	1	83.33	75	5	5	2	4	4	4	1	4	4	3	1	1
14	0	https://youtu.be/Qd-26HdJP6I?si=qFyQjXtRMR7fPV6B	mountsinaihealthsystem	96	147000	720	0	0	88	14153	53	3	56	4	1	0	1	1	3	1	1	1	1	0	0	0	0		1	1	1	1	1	0		58.33	50	4	3	1	5	3	3	1	2	3	4	1	1
15	0	https://youtu.be/YVBQ6wMELmg?si=veINaITMMpoxPfe1	bridierochesonograpy	57	4930	720	1	1	78	14075	128	3	131	0	1	0	1	1	3	1	1	1	1	0	0	1	0		1	1		1	1	1		58.33	75	2	2	1	3	4	3	1	1	3	1	1	1
16	0	https://youtu.be/DW3UPAYIxG0?si=_sPTCSwh6yjIi2DO	aliemeducationalvideos	25	6480	480	7	7	4	443	0	0	0	5	1	0	1	1	3	0	0	0	0			0			0			1	0	0		0	25	1	1	1	3	5	2	1	1	1	1	1	1
17	0	https://youtu.be/d7IelTXWoKc?si=ysCXBr6puo1YrtUU	radiologymadeeasy	96	102000	360	7	7	2379	11365	212	5	217	2	1	0	1	1	3	1	1	1	1	1	0	1	0	1	1	1	1	1	1	1		83.33	75	5	5	1	5	3	3	1	3	3	4	1	1
18	0	https://youtu.be/CPQYN0gAQLM?si=8SDML-1_fn1gZSur	radiologymadeeasy	96	102000	360	7	7	1391	10727	180	9	189	4	1	1	1	1	4	1	1	1	1	1	0	1	0	1	1	1	1	1	1	1		83.33	75	5	5	1	5	3	3	3	4	3	1	1	1
19	0	https://youtu.be/F_Pqa0Z8BJM?si=3tFD4t6Tc2w4UayU	drismailsayedismail	34	48900	480	1	1	493	4323	250	11	261	5	1	0	1	1	3	1	1	1	1	1	0	1	0	1	1	1	1	1	1	1		83.33	75	5	5	2	4	4	3	3	3	3	3	1	1
20	0	https://youtu.be/Ng19sAenXXE?si=y4SjujTgrdJyTD4Y	sonographictendencies	37	65600	720	7	7	340	9074	143	7	150	1	1	0	1	1	3	1	1	1	1	1	0	1	0	1	1	1	1	1	1	0		83.33	75	4	4	1	3	4	3	1	3	3	1	1	1
21	0	Pediatric Renal Tumors Usual and Unusual - YouTubeg	Radiology Video - radiology made esay	86	101000	360	13	0	1903	8808	115	4	119	1	1	1	1	1	4	1	1	1	1	1	0	1	1	1	1	1	1	1	1	1	1	91.67	100	5	5	1	5	3	5	5	5	3	3	1	1
22	0	https://youtu.be/jDJD_qLciJU?si=VjVD0CLczAvGLn9T	For Medical Sonography Professionals	36	731	480	13	0	42	1705	19	0	19	9	1	0	1	1	3	0	0	1	0			0				0		1	0	0		16.67	33.33	2	2	1	3	4	3	1	1	1	1	1	1
23	0	https://youtu.be/ns_RucEX048?si=giKUAkphaXuor1rO	Ultrasound Board Review	41	15900	720	7	0	68	625	10		10	1	0	0	1	1	2	0	0	1	0	1	0	0	0			0		1	0	0		16.67	33.33	2	2	1	3	4	3	1	1	1	1	1	1
24	0	https://youtu.be/704PHxx80-I?si=VV_KiVODgkBffzf1	Ultrasound Board Review	37	15900	1440	7	0	37	31	0		0	0	0	0	1	1	2	0	0	0	0		0	0	1	0	0			1	0	0		11.11	33.33	3	3	1	3	4	3	1	1	1	1	1	1
25	0	https://youtu.be/dSp9Q8BipiQ?si=e2iXNoXAMwgr8tVP	Для врачей УЗИ	44	7260	480	1	1	27	1399	11	0	11	1	0	0	1	1	2	0	0	0	0		0	0	1	0	0			1	0	0		11.11	33.33	1	1	1	3	4	3	1	1	1	1	1	1
26	0	https://youtu.be/p2HpN3phKY4?si=LW6XXADLs9Ff_EqV	Pediatricradiologyacademy	36	11000	720	13	0	4311	1279	36	2	38	2	1	1	1	1	4	1	1	1	1	1	0	1	1	1	1	1	1	1	1	1	1	91.67	100	5	5	1	5	4	5	1	5	5	4	1	1
27	0	https://youtu.be/Ippzsc7gAFs?si=38iSZa58Xzib81Cx	Focused Ultrasound Foundation	72	4280	1080	7	0	1014	1218	16	3	19	9	1	1	0	1	1	1	1	0	1	1	0	1	1	1	1	1	1	1	1	0	1	83.33	75	3	3	1	5	3	3	3	3	3	3	1	1
28	0	https://youtu.be/m6ZPyB4q6eQ?si=mINuYzBEZAIan_1A	Pediatric Ultrasound Multisite Conference	2	696	1080	13	0	3344	1198	16	0	16	3	1	1	1	1	4	1	1	0	1	1	0	1	1	1	1	1	1	1	1	0	1	83.33	75	5	5	1	5	5	5	5	5	5	4	1	1
29	0	https://youtu.be/07b8GgEm2aw?si=QyHWayhogOE3nUCz	Gulfcoast Ultrasound Institute	92	32800	720	7	3	81	1143	3	0	3	10	1	0	1	1	3	0	0	0	0			0						0	0	0		0	0	2	2	1	2	3	3	1	1	1	1	1	1
30	0	https://youtu.be/kNLOhmR2TzA?si=B1ux3ecb1oK40XmE	Для врачей УЗИ	60	7260	480	1	1	90	1143	27	0	27	6	0	0	1	1	2	0	0	1	0	0	0	0	0					0	0	1	1	12.5	0	1	1	1	3	4	3	1	1	1	1	1	1
31	0	https://youtu.be/E71FbLSO_VA?si=qY-NMexeREh5wFr_	Для врачей УЗИ	36	7260	480	1	1	94	1145	27	0	27	6	0	0	1	1	2	0	0	1	0	0	0	0	0					0	0	1	1	12.5	0	1	1	1	3	4	3	1	1	1	1	1	1
32	0	https://youtu.be/X7R-jHw0ncU?si=dtbajSGGsqxUWazw	Ultrasound cases	26	2660	1080	13	1	183	1125	21	0	21	0	0	0	1	1	2	0	0	0	0			0						0	0	0		0	0	3	3	1	4	5	3	1	1	1	1	1	1
33	0	https://youtu.be/zmITVVOH7gw?si=M17rb5gaHfeZr15b	Для врачей УЗИ	30	7260	480	1	1	16	1121	14	0	14	9	0	0	1	1	2	0	0	1	0	0	0	0	0					0	0	1	1	12.5	0	1	1	1	3	5	3	1	1	1	1	1	1
34	0	https://youtu.be/CsiTU_tMVtA?si=0x7y-E3onfHq5T8u	Для врачей УЗИ	63	7260	480	1	1	30	1086	9	0	9	0	0	0	1	1	2	0	0	1	0	0	0	0	0					0	0	1	1	12.5	0	1	1	1	3	4	3	1	1	1	1	1	1
35	0	https://youtu.be/nZ0UIIEulyI?si=TWray3RI6ILE0lBP	Для врачей УЗИ	22	7260	480	1	1	29	1078	21	0	21	9	0	0	1	1	2	0	0	1	0	0	0	0	0					0	0	1	1	12.5	0	1	1	1	3	5	3	1	1	1	1	1	1
36	0	https://youtu.be/cvyyprQQPFs?si=tvmo76any_mXFkFF	Для врачей УЗИ	60	7260	480	1	1	9	973	5	2	7	1	0	0	1	1	2	0	0	1	0	0	0	0	0					0	0	1	1	12.5	0	1	1	1	3	4	3	1	1	1	1	1	1
37	0	https://youtu.be/XISqP1ZWCwc?si=k3lLvi5PJx1n3Sk4	Для врачей УЗИ	10	7260	480	1	1	43	955	15	0	15	9	0	0	1	1	2	0	0	1	0	0	0	0	0					0	0	1	1	12.5	0	1	1	1	3	5	3	1	1	1	1	1	1
38	0	https://youtu.be/rfnh5tkELTU?si=OWm0LQtB9rL3UfT6	Для врачей УЗИ	45	7260	480	1	1	117	920	12	0	12	6	0	0	1	1	2	0	0	1	0	0	0	0	0					0	0	1	1	12.5	0	1	1	1	3	4	3	1	1	1	1	1	1
39	0	https://youtu.be/TN2YzcmzwUY?si=V1-9PX8PPBBG1eRt	Для врачей УЗИ	18	7260	480	1	1	14	925	14	0	14	2	0	0	1	1	2	0	0	1	0	0	0	0	0					0	0	1	1	12.5	0	1	1	1	3	5	3	1	1	1	1	1	1
40	0	https://youtu.be/RDbfIcPvbA0?si=-K5OqfD0GtV9xAZu	Для врачей УЗИ	10	7260	480	1	1	29	933	8	0	8	9	0	0	1	1	2	0	0	1	0	0	0	0	0					0	0	1	1	12.5	0	1	1	1	3	5	3	1	1	1	1	1	1
41	0	https://youtube.com/shorts/D1wK9zck-Tw?si=vT67NMe5qH3VrXxi	Dr Anuj Aggarwal	10	7820	360	1	0	30	1465	46	0	46	2	1	0	1	1	3	1	0	1	0	1	1	1		1		1		0	0	0		77.78	0	1	1	1	3	5	3	1	1	1	1	1	1
42	0	https://youtu.be/hf_c6Oh2KXU?si=aoyuxfZvZolnvrok	Philips Healthcare	36	96800	360	12	2	146	1435	12	0	12	2	1	0	1	0	2	1	1	1	1	1	0	1	0	1	1	1		1	1	0		81.82	66.67	1	1	2	4	4	3	1	1	3	1	1	1
43	0	https://youtu.be/BOsOedxDPz0?si=qjLfemL4Wfk7YafC	Ultrasound Board Review	48	15800	480	7	0	17	224	10	0	10	1	0	1	1	0	2	0	0	1	0	1		0		1		1		1	0	0		50	33.33	1	1	1	3	4	3	1	1	1	1	1	1
44	0	https://youtu.be/Za-tK1X4WAo?si=YFAFBCKKvogQ9GUx	Ultrasound Board Review	53	15800	480	7	0	37	46	0	0	0	9	0	1	1	0	2	1	0	1	0	1		0		1		1		1	0	0		62.5	33.33	1	1	1	3	4	3	1	1	1	1	1	1
45	0	https://youtu.be/SC8zQI928AU?si=h8xU0Ou7rPxcXabU	Ultrasound Board Review	50	15800	480	7	0	45	190	2	0	2	6	0	1	1	0	2	1	0	1	0	1		0		1		1		1	0	0		62.5	33.33	1	1	1	3	4	3	1	1	1	1	1	1
46	0	https://youtu.be/njoyh6ai9XU?si=K6981rRODBq69zN5	For Medical Sonography Professionals	30	731	360	7	1	20	1365	17	0	17	5	0	1	1	1	3	1	0	1	0			0				1		1	0	0		50	33.33	1	1	1	3	4	3	1	1	1	1	1	1
47	0	https://youtu.be/R4mJfa9ZR8M?si=GxGUE1IflasUWHM6	AIUMultrasound	132	30700	360	7	0	72	1326	2	0	2	8	0	0	1	1	2	1	1	1	1	0	0	1	0		1			1	0	0		66.67	33.33	2	2	1	3	1	3	1	1	1	3	1	1
48	0	https://youtu.be/eRM6Cei0DO0?si=P112hhtr3R4sGN8S	Pediatric Ultrasound Multisite Conference	4	691	360	7	0	3236	1357	47	3	50	2	0	1	1	1	3	1	1	1	1	1	1	1	0	1	1	1		1	1	1		90.91	100	5	5	2	5	5	3	1	3	4	3	1	1
49	0	https://youtu.be/XaTavyj92iU?si=nZ08Rjo1T1v21thy	Radiology Video - radiology made esay	36	101000	480	7	0	2689	1316	32	0	32	10	0	1	1	1	3	1	1	1	1	1	1	1	0	1	1	1	1	1	1	1		91.67	100	5	5	2	5	4	4	5	4	3	5	1	1
50	0	https://youtu.be/crdWz0CWwRU?si=N2j4vZoYeJn5-9U8	Society for Pediatric Pain Medicine	9	279	380	7	0	125	1348	8	0	8	9	0	0	1	1	2	1	1	1	1	1	1	1	0	1	1	1		0	0	1		90.91	33.33	4	4	1	4	5	3	1	3	3	4	4	1
51	0	https://www.youtube.com/live/KaF3WezO2Cc?si=qLPCEww1ppS5T3dX	Pediatricradiologyacademy	36	11000	360	7	0	4459	1224	21	0	21	2	0	1	1	1	3	1	1	1	1	1	1	1	0	1	1	1		1	1	0		90.91	66.67	5	5	3	5	4	5	3	5	5	5	1	3
52	0	https://youtu.be/AgoMioJGftI?si=gS64EQ1-Gl7M3Qyk	Для врачей УЗИ	24	7260	480	7	1	16	1197	21	1	22	5	1	0	1	1	3	1	0	1	0			1				1		1	0	0		66.67	33.33	1	1	1	3	4	3	1	1	1	1	1	1
53	0	https://youtu.be/E5pLJxMmU-8?si=wBc-ZgjGSpcimb9U	Cleveland Clinic	36	513000	360	14	0	3215	1097	9	0	9	7	1	0	1	1	3	1	1	1	1	1	1	1	1	1	1	1		1	0	0		100	33.33	5	5	1	5	4	4	3	4	4	4	1	1
54	0	https://youtu.be/JIzyjAcGhgY?si=LMyMWKz2mVjS7k6o	Michael Mulick	36	394	360	3	0	179	1046	16	0	15	8	1	0	1	1	3	1	1	1	1	1	0	1	1	1	1	1		1	0	0		90.91	33.33	5	5	1	5	4	3	1	1	4	3	1	1
55	0	https://youtu.be/J6XrpTFDU7M?si=jxhDwXOVdjYdus82	Society for Pediatric Pain Medicine	11	279	360	7	0	151	901	12	0	12	9	0	0	1	1	2	1	1	1	0	1	1	1	0	1		1		1	0	0		80	33.33	5	4	1	5	5	3	1	1	4	1	1	1
56	0	https://youtu.be/UgunsaMfMEw?si=V6j0NsMfwPx4mMsy	Haig Setrakian	24	13	360	3	0	282	848	8	0	8	9	1	0	1	1	3	1	1	1	0	1	1	1	0	1	1	1	1	1	1	1		83.33	100	5	5	1	4	5	3	1	3	4	3	2	1
57	0	https://youtu.be/GxgGVW9ECx0?si=e00ONfwQYG-c-Brh	For Medical Sonography Professionals	109	731	480	7	1	14	841	3	0	3	5	0	1	1	1	3	1	0	1	0			0				1		1	0	0		50	33.33	1	1	1	3	2	3	1	1	1	1	1	1
58	0	https://youtu.be/IBUejVHjfts?si=w95-PdRH9AhqwP8k	Vicente Roques Escolar	4	27700	480	3	0	1044	865	56	1	57	7	0	1	1	1	3	1	1	1	1	1	1	1	0	1	1	1		1	0	1		90.91	66.67	5	5	3	5	5	4	5	3	4	5	3	1
59	0	https://youtu.be/XaNLzBt6fR8?si=IuR099G5prStRT4f	Для врачей УЗИ	45	7260	360	7	1	48	830	13	4	17	2	1	0	1	1	3	1	0	1	0			1				1		1	0	0		66.67	33.33	1	1	1	3	4	3	1	1	1	1	1	1
60	0	https://youtu.be/dZciNA6Tfqc?si=220W0cXmFsTLwCLO	Для врачей УЗИ	36	7260	480	7	1	27	819	13	2	15	2	1	0	1	1	3	1	0	1	0			1				1		1	0	0		66.67	33.33	1	1	1	3	4	3	1	1	1	1	1	1
61	0	Appendix Ultrasound - YouTube	Sonographic Tendencies	84	65500	1080	1	0	199	85860	830	0	830	2	1	1	1	1	4	1	1	1	1	1	0	1	0	1	1	1		1	1	0		81.82	66.67	3	3	1	3	3	3	1	1	3	1	1	1
62	0	https://youtu.be/WpJuARIoR6s?si=NXURu3eLy6RLG_dw	ECHO GEEK	117	1050	360	7	0	251	74332	423	17	440	5	0	0	1	1	2	1	0	0	0	1	1	0	0	1		1		1	0	0		50	33.33	3	3	1	3	2	3	1	1	1	1	1	1
63	0	A day in the life: Sonography Student - YouTube	Evelyn Garcia	28	1090	720	8	4	613	66766	0	132	132	10	1	0	1	1	3	1	1	1	1	0	0	1	0		1			0	1	0		66.67	33.33	1	1	1	1	4	1	1	1	1	1	1	1
64	0	https://youtu.be/AXfM6xLub9I?si=GjkVMiBka-Ra91su	Radiologyinfodotorg	92	7660	720	1	0	92	62006	0	0	0	10	1	1	1	1	4	1	1	1	1	1	1	1	0	1	1			1	1	1		90	100	3	3	3	4	3	3	1	1	3	3	1	1
65	0	Children's of Alabama ULTRASOUND - YouTube	Children's of Alabama	108	5660	480	6	3	97	61338	151	0	151	10	1	1	1	1	4	1	1	1	1	1	0	1	0		1			1	1	1		77.78	100	3	3	3	4	2	3	1	1	3	1	1	1
66	0	https://youtu.be/E0YCpIOAr00?si=bWVbGEpCh9ZzjmCA	Sonographic Tendencies	36	65500	720	1	0	672	60009	1714	71	1785	7	1	1	1	1	4	1	1	1	1	1	0	1	0	1	1	1		1	1	1		81.82	100	1	1	1	2	4	2	1	1	1	1	1	1
67	0	https://youtu.be/vz7I8nXnfKA?si=IfLcT0MgBkTuYvVY	Pediatricradiologyacademy	85	10900	720	1	0	100	59427	593	6	599	7	1	1	1	1	4	1	1	1	1	1	0	1	0		1	1		1	1	1		80	100	5	5	1	4	3	4	1	3	4	1	1	1
68	0	https://www.youtube.com/watch?v=ARjTaZ1yr2E	Ann & Robert H.Lurie Children's Hospital of Chicago	31	32000	720	6	3	317	55517	216	16	232	10	1	1	1	1	4	1	1	1	0	1	0	1	0		1			1	1	1		66.67	100	4	4	3	5	4	3	1	1	3	2	1	1
69	0	https://youtu.be/Q8S4ddYvHAs?si=SRw86G7zqs6-rPfh	Simple Haze	20	1230	720	4	4	1098	53088	1332	109	1441	10	1	0	1	1	3	1	1	1	1	1	0	1	0		1			1	0	1		77.78	66.67	3	3	1	3	5	3	1	3	3	1	1	1
70	0	https://youtu.be/mxxRqKONfVI?si=bwm5_Km0aWt3B2TM	Nysora - education	21	190000	720	3	0	277	46819	871	43	914	9	1	1	1	1	4	1	0	0	1	1	0	1	0		1	1		1	0	1		55.56	66.67	5	5	1	5	5	4	3	3	5	2	2	1
71	0	https://youtu.be/2d4Ct4nmU7A?si=5XTFSEo33w7IuWuQ	Regional Anesthesiology and Acute Pain Medicine	18	48500	720	3	0	570	42064	825	23	848	7	1	1	1	1	4	1	1	0	1	1	0	1	0	1	1	1		1	1	1		72.73	100	5	5	2	5	5	5	4	4	5	5	5	1
72	0	https://youtu.be/C98XwOPKjXw?si=z82Lb9qj4q41-dOr	Tanisha Jowsey	32	1340	720	10	1	262	23141	84	0	84	2	1	0	1	1	3	1	1	1	1	0	0	1	0		1			1	0	1		66.67	66.67	1	1	3	2	4	1	1	1	1	1	1	1
73	0	https://youtu.be/LGu4Ddgj9IM?si=csgwmlzhlxVye-5u	SickKids	97	82700	720	0	3	308	306498	760	0	760	10	1	0	1	1	3	1	1	1	1	1	0	1	0		1			1	1	0		77.78	66.67	4	4	5	4	3	3	1	2	3	3	1	1
74	0	https://youtu.be/SyGyWhQA334?si=a_fte_420vCNOAes	Hospital for Special Surgery	154	196000	360	1	1	77	575	0	0	0	0	1	0	1	1	3	1	1	0	1	1	0	1	0		1	0		1	0	1		60	66.67	3	3	3	5	1	3	1	1	1	1	1	1
75	0	https://youtu.be/GfFdr3DFjlA?si=lYOjRiH8m4mG7-Rg	Noreddine Bouarroudj	90	2800	480	3	0	75	14086	60	0	60	9	1	1	1	1	4	1	0	0	0	1	0	0	0	1		1		1	0	0		40	33.33	2	2	1	3	3	3	1	1	2	1	1	1
76	0	https://youtu.be/fzqZ6En5bus?si=prma6_jiWZBC5nyI	Butterfly Network	38	9350	360	12	4	86	8267	49	0	49	8	1	0	1	1	3	1	1	1	1	1	0	1	0		1			1	0	1		77.78	66.67	3	3	2	4	4	3	1	1	3	3	1	1
77	0	https://youtu.be/o9X9zaMAQ6I?si=BgEQ569YS5WXmV0z	FamVibes	42	1200	144	10	1	624	8053	59	3	62	1	0	0	1	1	2	1	1	1	1	1	0	1	0		1			1	0	1		77.78	66.67	2	2	3	2	4	3	1	1	2	1	1	1
78	0	https://youtu.be/GsWMQGVkJZU?si=P9Bh6Gcv0w2dd9Cu	CHOC Children's	50	14400	720	6	3	76	7607	35	0	35	10	1	1	1	1	4	1	1	1	0	1	0	1	0		1			1	0	1		66.67	66.67	3	3	3	3	4	3	1	1	3	1	1	1
79	0	https://youtu.be/0QdwB2Jr4_o?si=tModVPt1MO6ZRLRj	Bridie Roche Sonographer	8	4800	480	1	1	456	6058	115	3	118	7	1	1	1	1	4	1	1	0	1	1	0	1	0	1	1	1		1	1	1		72.73	100	3	3	1	5	5	4	4	4	4	1	1	1
80	0	https://youtu.be/T57sN3SGAes?si=LKhl5aaoTg0oqwNe	SIMTICS	159	39700	480	7	0	180	124799	411	14	425	0	1	1	1	1	4	1	1	0	0	1	0	1	0		1	1		1	1	1		60	100	4	4	1	4	1	3	1	1	4	1	1	1
81	0	https://youtu.be/1oTk5pDwGnA?si=yS2AqkGaHlyKTmcI	SIMTICS	159	39700	480	7	0	180	86467	313	13	326	7	1	1	1	1	4	1	1	0	0	1	0	1	0		1	1		1	1	1		60	100	4	4	1	4	1	3	1	1	4	1	1	1
82	0	https://youtu.be/DNPx-XrdCuQ?si=rnpiVDV-ODcW8gO-	SIMTICS	159	39700	480	7	0	180	52434	135	7	142	2	1	1	1	1	4	1	1	0	0	1	0	1	0		1			1	1	1		55.56	100	4	4	1	4	1	3	1	1	4	1	1	1
83	0	https://youtu.be/TaSSS4Fsi5o?si=CguZH5QoDXQX160P	SIMTICS	159	39700	480	7	0	180	149983	259	5	264	6	1	1	1	1	4	1	1	0	0	1	0	1	0	1	1	1		1	1	1	0	63.64	75	4	4	1	4	1	3	1	1	3	1	1	1
84	0	https://youtu.be/YPyyYF3sRgU?si=HqPPwoTM_sPCTxfO	Indian Radiologist	13	73100	720	1	0	1102	4860	140	8	148	7	1	0	1	1	3	1	1	0	1	1	0	1	1	1	1	1		1	1	1		81.82	100	5	5	2	5	5	5	5	5	5	4	1	1
85	0	https://youtu.be/tFS4VF-jWUQ?si=zYodZDDLP_2t81CT	AIUMultrasound	86	30800	720	0	0	3459	4754	69	2	71	0	1	1	1	1	4	1	1	0	1	1	0	1	1	1	1	1	1	1	1	1	1	83.33	100	5	5	1	5	3	5	5	5	5	4	1	1
86	0	https://youtu.be/mqSGDpW3dp8?si=CcpbgP3iWheljzZE	Для врачей УЗИ	109	7250	480	7	0	14	4723	22	2	24	2	0	0	1	1	2	0	0	1	0			0						1	0	0		20	33.33	1	1	1	3	2	3	1	1	1	1	1	1
87	0	https://youtu.be/uVjkCS95wl4?si=r2mx70hzLvDUPIYZ	POCUS101	24	30900	480	3	0	881	4782	120	2	122	2	1	1	1	1	4	1	1	0	1	1	0	1	1	1	1	1		1	1	1		81.82	100	5	4	1	4	5	3	2	3	3	1	1	1
88	0	https://youtu.be/74XOZ5X5ZC0?si=cqRJyqQZ0akmT6x-	ASHEA	13	3150	720	4	4	1549	4783	0	18	18	10	1	0	1	1	3	1	1	1	1	1	0	1	0	1	1			1	1	1		80	100	1	1	2	2	5	1	1	1	1	1	1	1
89	0	https://youtu.be/Q3zjCLPucXo?si=HGEdNVQnmgyiISb1	Sonographic Tendencies	37	65500	1080	1	0	360	3866	89	11	100	10	1	0	1	1	3	1	1	0	1	1	0	1	0	1	1	1		1	1	1		72.73	100	5	5	1	4	4	4	1	3	3	1	1	1
90	0	https://youtu.be/FkJCGT4lXw4?si=EFQwqZYjpqiwbk1-	Canon Medical US	110	5570	720	1	0	1790	3774	0	0	0	10	1	0	1	1	3	1	1	0	1	1	0	1	0	1	1	1		1	1	1		72.73	100	4	4	4	4	2	4	1	4	3	4	1	1
91	0	https://youtu.be/p10t7azDa3E?si=8OSzf8vc8sRAwph-	Для врачей УЗИ	12	7260	480	7	0	61	1512	27	2	29	2	0	0	1	1	2	0	0	1	0	0	0	0						1	0	0		14.29	33.33	1	1	1	3	5	3	1	1	1	1	1	1
92	0	https://youtu.be/OTIpKbhH5fk?si=NlTuLE_U3d2AToao	Kendra Morgan	83	7	720	5	0	875	1473	5	0	5	2	0	1	1	1	3	1	1	0	1	1	1	1	0	1	1			1	0	1		80	66.67	5	3	3	5	3	2	5	2	1	5	5	3
93	0	https://youtu.be/XZmu4TxAQfk?si=ROPqjskURMev2rdI	Pediatricradiologyacademy	36	11000	720	0	0	4665	1402	43	3	46	2	1	1	1	1	4	1	1	0	1	1	0	1	1	1	1	1	1	1	1	1	1	83.33	100	5	5	3	5	4	5	4	5	5	3	1	1
94	0	https://youtu.be/U3Zja9gs7bU?si=T10WSvJuJT6XRMPv	For Medical Sonography Professionals	30	730	480	7	0	50	1369	8	4	12	2	0	0	1	1	2	1	0	1	0			1						1	0	0		60	33.33	2	2	1	3	4	3	1	1	1	1	1	1
95	0	https://youtu.be/frYMmpnM6fA?si=-0lv8Wozo1rrI_KT	For Medical Sonography Professionals	39	730	480	7	0	17	1296	20	0	20	2	0	0	1	1	2	1	0	1	0			1						1	0	0		60	33.33	2	2	1	3	4	3	1	1	1	1	1	1
96	0	https://youtu.be/s9UzUtBVvko?si=9au51PoHCXC8uqHs	Для врачей УЗИ	12	7260	480	7	0	51	1017	14	0	14	2	0	0	1	1	2	0	0	1	0			0						1	0	0		20	33.33	2	2	1	3	5	3	1	1	1	1	1	1
97	0	https://youtu.be/PDuGAkr4wec?si=Lg-HSqpApgdJBbG4	Для врачей УЗИ	24	7260	480	7	0	22	889	31	5	36	1	0	0	1	1	2	0	0	1	0			0						1	0	0		20	33.33	2	2	1	3	4	3	1	1	1	1	1	1
98	0	https://youtu.be/wNagrPjJKwY?si=8udz3R5iQKJCJWeV	For Medical Sonography Professionals	34	730	240	7	0	21	877	8	0	8	6	0	0	1	1	2	1	0	1	0			1						1	0	0		60	33.33	2	2	1	3	4	3	1	1	1	1	1	1
99	0	https://youtu.be/mC4My9Y-0qY?si=hqUgSd2MXsLoNMcf	Для врачей УЗИ	14	7260	480	7	0	43	674	11	0	11	3	0	0	1	1	2	0	0	1	0			0						1	0	0		20	33.33	2	2	1	3	5	3	1	1	1	1	1	1
100	0	https://youtu.be/GVap8gap1z8?si=ptRW3ExraB7rQOJF	For Medical Sonography Professionals	29	730	480	7	0	23	636	10	5	15	2	0	0	1	1	2	0	0	1	0			0						1	0	0		20	33.33	2	2	1	3	4	3	1	1	1	1	1	1
101	0	https://youtu.be/xlZh3H6zugY?si=RUsrmvhoECXagYOh	Freya's Lucky arm	1	9080	720	10	1	768	9022	749	84	833	1	1	0	1	1	3	1	1	1	1	0	0	1	0		1			1	0	0		66.67	33.33	1	1	2	1	5	1	1	1	1	1	1	1
102	0	https://youtu.be/03aBMNSCuzA?si=w10_u1bzihzQHrYR	AIUMultrasound	81	30800	720	1	0	4127	8609	152	3	155	10	1	0	1	1	3	1	1	0	1	1	0	1	1	1	1	1		1	1	1		81.82	100	5	5	2	4	3	4	4	5	5	2	1	1
103	0	https://youtu.be/G2ixSn4O0A4?si=WRPuApB2xjh23uVb	Ortho M8	28	12600	720	3	1	138	7405	68	0	68	0	0	0	1	1	2	1	0	0	0	1	0	1	0	1		1		0	0	0		50	0	2	2	1	3	4	3	1	1	3	1	1	1
104	0	https://www.youtube.com/watch?v=1AbVHGt-k8A	UltraSoundHD	124	10200	720	7	0	2689	7159	34	0	34	10	0	0	1	1	2	1	1	0	1	1	0	1	0	1	1	1		1	0	0		72.73	33.33	5	5	3	5	2	4	4	4	5	5	1	1
105	0	https://youtu.be/9Ci9u6M2zII?si=2D5Uygg9TUH2-cwv	rache1danie11e	111	30	720	3	0	762	4189	36	1	37	4	1	1	1	1	4	1	1	0	1	1	0	1	1	1	1	1	1	1	0	1	1	83.33	75	5	5	1	5	2	5	5	4	5	5	1	1
106	0	https://youtu.be/4wAsODPEBrM?si=k3SZGslWfBvc-NZy	Для врачей УЗИ	28	7270	480	7	0	32	386	18	0	18	0	0	0	1	1	2	0	0	1	0			0						1	0	0		20	33.33	2	2	1	3	4	3	1	1	1	1	1	1
107	0	https://youtu.be/VdHQqo7IC7Q?si=YEy7tq05FGh9eUmi	UltraSoundHD	124	10200	720	7	0	2141	4688	32	0	32	8	0	0	1	1	2	1	1	0	1	1	0	1	0	1	1	1		1	0	1		72.73	66.67	5	5	3	5	2	4	1	3	5	5	5	1
108	0	https://youtu.be/j7LvFgLd9jI?si=a0kjqK7VOQNwQX_A	Sonographic Tendencies	80	65500	1080	1	0	1921	24247	425	10	435	2	0	0	1	1	2	1	1	0	1	1	0	5	0	1	1	1		1	0	1		72.73	66.67	5	5	1	4	3	4	1	3	3	3	1	1
109	0	https://youtu.be/ja66mkSrI0M?si=TSZEWLAS7Ia5Lmvb	Radiology Video- radiology made easy	163	101000	360	1	0	1863	1912	51	3	54	4	1	0	1	1	3	1	1	0	1	1	0	1	0	1	1	1		1	0	1		72.73	66.67	5	5	1	5	4	4	1	4	5	3	1	1
110	0	https://youtu.be/F3-ZZ-yABOo?si=9a-yxuDNeVK5vlA8	Dr. Mehak Bansal	43	145	720	0	0	2682	1019	38	2	40	4	1	0	1	1	3	1	1	0	1	1	0	1	0	1	1	1	1	1	0	1	1	75	75	5	5	1	5	4	5	5	5	5	3	1	1
111	0	https://youtu.be/xzwvJYDIPBA?si=-A1_IpCO0Ft8OVas	Для врачей УЗИ	29	7260	480	7	0	18	978	21	18	39	9	0	0	1	1	2	0	0	1	0			0						1	0	0		20	33.33	2	2	1	3	4	3	1	1	1	1	1	1
112	0	https://youtu.be/aDg9wuEk6ks?si=KP7kGEnn23FwK_2v	Для врачей УЗИ	49	7260	480	7	0	59	926	21	0	21	0	0	0	1	1	2	0	0	1	0			0						1	0	0		20	33.33	2	2	1	3	4	3	1	1	1	1	1	1
113	0	https://youtu.be/Lbh35uVXvXA?si=57FgsaPx_Iibs-Dn	For Medical Sonography Professionals	24	65500	1080	7	0	128	10765	207	15	222	6	0	0	1	1	2	1	1	0	1	0	0	1	0	0	1	1		1	0	0		54.55	33.33	2	2	1	3	4	3	1	1	1	1	1	1
114	0	https://youtu.be/m57Aa_TLBI4?si=85hoiQ63shcnU7s3	Для врачей УЗИ	61	7260	480	7	0	64	833	10	0	10	0	0	0	1	1	2	0	0	1	0	0	0	0	0					1	0	0		12.5	33.33	2	2	1	3	4	3	1	1	1	1	1	1
115	0	https://youtu.be/MqeWB1Ixfa0?si=MZoMjrLZbnCB8goB	Для врачей УЗИ	26	7260	480	7	0	120	780	21	5	26	3	0	0	1	1	2	0	0	1	0	0	0	0	0					1	0	0		12.5	33.33	2	2	1	3	5	3	1	1	1	1	1	1
116	0	https://youtu.be/v5F7sun_zzU?si=QDCSs2uC9oW0w6E-	Для врачей УЗИ	41	7260	480	7	0	44	783	16	0	16	6	0	0	1	1	2	0	0	1	0			0						1	0	0		20	33.33	2	2	1	3	4	3	1	1	1	1	1	1
117	0	https://youtu.be/-KT0cqQtOg4?si=DlYFpWa2i4gKRmbv	Pediatricradiologyacademy	36	11000	720	1	0	4040	780	30	0	30	7	1	0	1	1	3	1	1	0	1	1	0	1	1	1	1	1	1	1	0	1	1	83.33	75	5	5	1	5	4	4	4	4	5	3	1	1
118	0	https://youtu.be/XkW2jDLvMI0?si=naeg1k48RAsv_uLn	Gulfcoast Ultrasound Institute	107	32800	720	4	1	48	754	3	0	3	0	0	0	1	1	2	1	1	0	1			1		1	1			1	0	0		85.71	33.33	3	3	1	3	2	3	1	1	2	2	1	1
119	0	https://youtu.be/s1IqFyBhCQk?si=BQGC1U3_V0tHXSAc	Для врачей УЗИ	28	7260	480	7	0	17	740	5	2	7	9	0	0	1	1	2	0	0	1	0			0						1	0	0		20	33.33	2	2	1	3	4	3	1	1	1	1	1	1
120	0	https://youtu.be/7-NtSsbbyLs?si=ctUTU1zaGenqF0KE	Для врачей УЗИ	26	7260	360	7	0	11	726	10	0	10	1	0	0	1	1	2	0	0	1	0			0						1	0	0		20	33.33	2	2	1	3	5	3	1	1	1	1	1	1
121	0	https://youtu.be/UuHl6JyyAFM?si=dmpCvzfG--CW89yI	rdavidm1	145	10800	480	1	0	136	37964	205	2	207	2	0	0	1	1	2	1	0	0	1	0	0	0	0		1	1		0	1	1		40	66.67	3	3	1	4	2	4	1	1	3	1	1	1
122	0	https://youtu.be/krfTmZBOqvA?si=YBUbr_uJkPRFVANx	Childrens Health Queensland	39	1220	1080	6	0	116	37700	163		163	10	1	0	1	1	3	1	1	1	1	1	1	1	0	1	1	1		1	1	1		90.91	100	5	4	5	3	4	2	1	1	4	4	3	1
123	0	https://youtu.be/XTjQdVzn19A?si=yjZzmxklccMPiDxI	formedicalsonographyprofes7380	24	732	480	1	1	35	454	2	0	2	2	1	0	1	1	3	0	0	1	0	1		1				1		0	0	0		57.14	0	2	2	1	2	5	3	1	1	2	1	1	1
124	0	https://youtu.be/-m8LOgriuRQ?si=f8iwBqWi3QNC4s68	Saeed Ahmad	45	50600	720	7	1	231	12505	127	10	137	2	0	0	1	1	2	1	1	1	1	1	0	1	0		1	1		1	1	1		80	100	4	4	5	4	4	4	4	1	3	4	1	1
125	0	https://youtu.be/G0QSHBG5E-w?si=dIvMZdh3tJJtY6BN	123radiology	45	142000	720	7	0	636	12494	380	23	403	9	0	0	1	1	2	1	1	1	0	1	1	1	0	1	1	1	1	1	1	1	1	83.33	100	3	4	1	3	4	4	1	1	3	1	1	1
126	0	https://youtu.be/qSqxtnTE7AM?si=7L-HajVskoui389f	Sonographic Tendencies	6	65500	1080	7	0	3724	5329	232	9	241	10	1	1	1	1	4	1	1	1	1	1	0	1	1	1	1	1	1	1	1	1	1	91.67	100	4	4	2	4	5	4	3	2	4	5	3	2
127	0	https://youtu.be/ENJbqXVTers?si=UnaPvwCYBMQY4Gxy	Dr Sams Imaging Library	1	76300	1080	1	0	668	3549	168	25	193	2	1	0	1	1	3	1	1	1	1	1	0	1	0	1	1	1	1	1	1	1	1	83.33	100	4	4	1	4	5	4	3	1	3	1	1	1
128	0	https://youtu.be/HN9WYi2S2Jg?si=yYeLKoKt1Z9Bkh_-	ultrasound board review	57	15900	1080	7	0	51	46	1		1	7	0	0	1	1	2	1	0	1	0	1		1				1		0	0	1		71.43	33.33	1	1	1	1	4	3	2	1	1	1	1	1
129	0	https://youtu.be/mtVH5d0zE08?si=fW8VrmI7CSt5uVLk	ultrasound board review	57	15900	1080	7	0	34	66	2		2	7	0	0	1	1	2	1	0	1	0	1		1				1		0	0	1		71.43	33.33	1	1	1	1	4	3	2	1	1	1	1	1
130	0	https://youtu.be/nD4sSlQ-VjQ?si=zAJC-MunODcWIXGY	ultrasound board review	57	15900	1080	7	0	56	60	1		1	7	0	0	1	1	2	1	0	1	0	1		1				1		0	0	1		71.43	33.33	1	1	1	1	4	3	2	1	1	1	1	1
131	0	https://youtu.be/7H1Q4yHCKQE?si=qCPl1pZDsqvEI_40	ultrasound board review	57	15900	1080	7	0	36	34	0		0	7	0	0	1	1	2	1	0	1	0	1		1				1		0	0	1		71.43	33.33	1	1	1	1	4	3	2	1	1	1	1	1
132	0	https://youtu.be/WWMmY9m1qMg?si=B-FeHtrge6OdphDd	ultrasound board review	57	15900	1080	7	0	14	85	2		2	2	0	0	1	1	2	1	0	1	0	1		1				1		0	0	1		71.43	33.33	1	1	1	1	4	3	2	1	1	1	1	1
133	0	https://youtu.be/hIs0qcz5ShM?si=mog7qZG-k4SXtnIl	ultrasound board review	57	15900	1080	7	0	50	97	1		1	7	0	0	1	1	2	1	0	1	0	1		1				1		0	0	1		71.43	33.33	1	1	1	1	4	3	2	1	1	1	1	1
134	0	https://youtu.be/VzAsIDjdjGM?si=wWBIkT5YDJh723oT	icudemy	35	362	720	3	3	3681	371	7	0	378	8	1	1	1	0	3	1	1	1	1	1		1	1	1	1	1	1	1	1	1	1	100	100	1	1	1	1	4	3	2	1	1	1	1	1
135	0	https://youtu.be/DpKptZGn7Wk?si=XC2une0A5kCiJsPv	ultrasound board review	57	15900	1080	7	0	46	71	2		73	2	0	0	1	1	2	1	0	1	0	1		1				1		0	0	1		71.43	33.33	1	1	1	1	4	3	2	1	1	1	1	1
136	0	https://youtu.be/3UOxPWQpeeo?si=I6KLeEb1Cdcks5bL	ultrasound board review	55	15900	1080	7	0	43	23	0		23	1	0	0	1	1	2	1	0	1	0	1		1				1		0	0	1		71.43	33.33	1	1	1	1	4	3	3	1	1	1	1	1
137	0	https://youtu.be/BOsOedxDPz0?si=qjLfemL4Wfk7YafC	ultrasound board review	55	15900	1080	7	0	17	242	13		255	1	0	0	1	1	2	1	0	1	0	1		1				1		0	0	1		71.43	33.33	1	1	1	1	4	3	3	1	1	1	1	1
138	0	https://youtu.be/R5Gk2GZH2mY?si=m_D6pTeFgU7r7HZx	ultrasound board review	15	15900	1080	7	0	45	184	3		187	10	0	0	1	1	2	1	1	1	1	1		1		1	1	1		1	1	1		100	100	3	4	2	3	5	4	3	3	2	1	1	1
139	0	https://youtu.be/kvvwT7JL16g?si=aTwSDSKRFqpj7ASg	ultrasound board review	11	15900	1080	7	0	116	178	1		179	7	0	0	1	1	2	1	1	1	1	1		1		1	1	1		1	1	1		100	100	3	2	1	3	5	4	3	1	3	1	1	1
140	0	https://youtu.be/W0rVRvKrPNo?si=51kw0Fxy9TT_FEVl	ultrasound board review	9	15900	1080	7	0	53	371	4		375	2	0	0	1	1	2	1	1	1	1	1		1		1	1	1		1	1	1		100	100	3	4	1	3	5	4	3	1	3	1	1	1
141	0	https://youtu.be/ng6zHKNBaSA?si=udk7GcXbnRXPiWyY	NewYorkOrtho	24	38600	480	3	0	262	10892	83	2	85	0	1	0	1	1	3	1	0	0	1	1	0	1	0		1	1		0	0	1		60	33.33	4	4	1	5	4	4	4	4	4	1	1	1
142	0	https://youtu.be/cYuPe7MY-2I?si=4YHTnu3_IQJRuJMr	Radiology Video - radiology made esay	36	101000	360	1	0	4718	10798	197	4	202	0	1	0	1	1	3	1	0	0	1	1	0	1	0	1	1	1		1	1	1		63.64	100	5	5	2	4	4	4	4	1	4	2	1	1
143	0	https://youtu.be/jE6WTGIwZbE?si=EsFJCy6iRPy2GPX2	DR. Ahmed Bassiouny	24	2360	480	1	0	601	4984	125	3	128	0	1	0	1	1	3	1	0	0	1	1	0	0	0	1	0	1	1	1	0	1	1	50	75	3	3	1	3	4	5	1	1	1	1	1	1
144	0	https://youtu.be/shHF2ndqKK4?si=cHoEMd4JJjkr9GQy	Imaging Study	24	51100	480	1	1	183	3293	82	5	87	7	1	0	1	1	3	1	0	0	1	1	0	1	1	1	1	1		1	1	1		72.73	100	4	4	1	1	5	5	1	2	2	3	1	1
145	0	https://youtu.be/pVn31_7hZmY?si=myzO3sFu6tjdsRH_	Iolgeselle	7	17500	480	4	0	540	3247	173	36	209	9	1	1	1	1	4	1	1	1	1	1	0	1	0	1	1	1		1	1	1		81.82	100	2	2	1	2	5	2	3	1	2	3	1	1
146	0	https://youtu.be/ThtL-KimID8?si=fZ1sn0Il_LUoj5Or	Orthopaedic Surgical Videos	36	35400	360	3	0	617	3058	22	0	22	9	1	0	1	1	3	1	0	0	1	1	0	1	0	1	1	1		1	1	1		63.64	100	5	5	1	4	4	5	3	1	5	4	4	1
147	0	https://youtu.be/edigbH56k_k?si=9ns3dJKRc33av7B-	Paediatric Gut Investigation Clinic	9	44	360	14	0	86	3105	17	3	20	2	1	0	1	0	2	1	1	1	1	0	0	1	0	1	1	1		1	1	1		72.73	100	3	3	4	4	5	1	1	1	4	3	1	1
148	0	https://youtube.com/shorts/kPoMPhkYJvg?si=h9PXzXncwkgweydK	Zahoor Health Care	8	1190		1	0	10	2946	16	0	16	1	0	0	1	1	2	0	0	1	0			0				1		0	0	0		33.33	0	1	1	1	1	5	1	1	1	1	1	1	1
149	0	https://youtu.be/BvzyAoBDE0Q?si=lG-phaM9qkmLIIPB	NYU Sono	144	81	480	1	0	6	2841	2	0	2	0	1	0	1	1	3	0	0	1	0			0				0		0	0	0		16.67	0	1	1	1	1	1	1	1	1	1	1	1	1
150	0	https://youtu.be/3D0-aSehCbs?si=inBC9sK0i42MvUDz	123sonography	12	79600	480	7	0	105	2667	64	0	64	9	1	0	1	0	2	1	1	1	1	0	0	1	0	1	1	1		1	1	1		72.73	100	5	5	1	4	5	3	1	1	1	5	1	1
151	0	https://youtu.be/251gIQi8az8?si=TzEMz7IBKohZyDns	American Society for Post Surgical Pain	24	1410	480	3	3	42	2727	11	1	12	9	0	0	1	1	2	1	0	0	0	0		1		1		1		1	0	1		50	66.67	2	4	1	1	4	1	1	1	4	1	1	1
152	0	https://youtube.com/shorts/l2Q2sFCOlFQ?si=0NrhgD1TvQwC8vJV	zahoor Health Care	8	1190		1	0	10	2660	12	0	12	1	0	0	1	1	2	0	0	1	0			0				1		0	0	0		33.33	0	1	2	1	1	5	1	1	1	2	1	1	1
153	0	https://youtu.be/1SmQXXB89SY?si=oGvwt27mvcK-j35L	Gulfcoast Ultrasound Institute	108	32700	360	7	0	55	2576	6	0	6	9	1	0	1	0	2	1	1	1	0	0		1		1		1		1	1	1		75	100	5	4	1	5	2	1	4	1	1	1	1	1
154	0	https://youtu.be/KgBVN9midNs?si=GXaxyUS-FxvBbr-8	Ultrasound Board Review	24	15800	480	7	0	1102	2570	36	0	36	9	1	0	1	1	2	1	1	0	1	1	0	1	0	1	1	1		1	1	1		72.73	100	5	5	1	2	4	2	1	1	1	1	1	1
155	0	https://youtu.be/5eXHXfW8QzA?si=qqLePT0FufZuqxtX	For Medical Sonography Professionals	36	730	480	7	1	15	2189	21	0	21	5	1	0	1	1	3	1	0	1	0	0		0		0		1		0	0	1		37.5	33.33	1	1	1	1	4	1	1	1	1	1	1	1
156	0	https://youtube.com/shorts/m874Jj8NcN0?si=pIbnxRG0pSlgzCX_	For Medical Sonography Professionals	36	730		7	0	48	2063	25	1	26	2	1	0	1	1	3	1	0	1	0	0		0		1		1		0	0	1		50	33.33	1	2	1	2	4	2	1	1	1	1	1	1
157	0	https://youtu.be/U_U7WkU5sQs?si=uarHdP3WgtpXkU5V	Radiologyinfodotorg	144	7670	480	1	0	186	1774	2	0	2	7	1	0	1	1	3	1	1	0	1	1	0	1	0	1	1	1		0	1	1		72.73	66.67	4	3	1	5	4	5	3	3	4	5	1	1
158	0	https://youtu.be/_4l1Etdlj3A?si=RXenCalZq1koT80i	Maddie's Daddy	72	7740	360	10	1	308	1751	9	8	17	0	1	0	1	1	3	1	1	1	1	1	0	0	0		1	1		0	1	1		70	66.67	2	2	2	1	3	1	1	1	1	1	1	1
159	0	https://youtu.be/KlhNrDJf6Yo?si=ib6mKisyBv7MYslu	Iolgeselle	24	17500	360	4	1	51	1730	46	18	64	7	1	0	1	1	3	1	0	1	0	0		0				1		0	0	1		42.86	33.33	3	3	1	4	4	3	1	1	1	1	1	1
160	0	https://youtu.be/zyq7QA3Rx9A?si=uhBPukQIRytWJ05k	Для врачей УЗИ	48	7260	480	1	1	27	1731	10	0	10	1	1	0	1	1	3	1	0	1	0	0		0				1		0	0	1		42.86	33.33	1	1	1	1	4	1	1	1	1	1	1	1
161	0	What happens in an Ultrasound scan? - YouTube	WWCIHCharity	72	73000	480	7	0	125	13000000	29317		29317	10	1	0	1	1	3	1	1	1	1	0	0	1	0	0				0	0	0	0	55.56	0	2	2	2	2	3	2	1	1	2	1	1	1
162	0	https://youtu.be/9wSxa3iLut4?si=9hRs6QZRDBBNRGwO	Focused ultrasound for pediatrics	36	4270	360	3	2	2727	442	10	2	12	7	1	1	1	1	4	1	1	1	1	1	1	1	1	1	1	1		0	0	1	1	100	50	5	5	4	5	4	5	4	1	5	4	1	1
163	0	Endoscopic Ultrasound (EUS) Procedure | Cincinnati Children's - YouTube	Cincinnati Children's	36	239000	480	0	3	114	2668273	10394		10394	2	0	0	1	0	1	1	0	1	0	0	0	1	0		1	1		0	0	1		50	50	3	3	3	4	4	3	1	1	4	3	1	1
164	0	How I do it: Ultrasound of the Abdomen - YouTube	Yale Radiology and Biom	60	59500	480	1	0	1156	2208854	0		0	2	0	0	1	0	1	1	0	0	0	1	0	0	0		1	1		0	0	1		40	33.33	5	5	1	4	3	4	1	1	5	4	1	1
165	0	How Does Ultrasound Work? - YouTube	NIBIBgov	96	23700	480	6	0	100	919875	7767	139	7906	10	0	0	1	0	1	1	1	1	0		0	0	0	1	1	1		0	0	1		60	33.33	5	3	1	4	2	4	1	1	3	2	1	1
166	0	What happens when my child has an Echo? - YouTube	WWCIHCharity	96	7300	480	7	0	226	734359	2174		2174	9	1	0	1	1	3	1	1	0	1	1	0	1	0		1	1		0	0	1		70	33.33	5	4	5	4	3	2	1	1	2	2	1	1
167	0	Basic Transthoracic Echocardiography (Cardiac Ultrasound) - TTE Made Simple - YouTube	POCUS 101	48	31000	480	3	3	1075	400479	8686	216	8902	5	0	1	1	1	3	1	1	0	1	1	0	1	0		1	1		0	0	1		70	33.33	5	5	1	4	4	4	1	1	4	1	1	1
168	0	Starting Your Sonography Journey-- EVERYTHING You Need to Know! - YouTube	Kristy DMS	42	15700	480	3	0	832	135654	6889	373	7262	10	0	0	1	1	2	1	1	1	1	1	1	1	0	1	1	1		0	1	1		91.91	66.67	4	3	1	2	4	2	1	1	1	4	1	1
169	0	Ultrasound Training: Pediatric Hip and Spine - YouTube	SIMTICS	156	39700	480	7	0	180	124847	411	14	425	0	0	0	1	1	2	1	1	1	0	1	0	1	0	0	1	1		0	1	1		63.34	66.67	4	3	1	3	1	4	1	1	3	1	1	1
170	0	Kidney Stones in Children: Symptoms and Diagnosis (2 of 5) - YouTube	The Children's Hospital of Philadelphia	120	202000	480	13	1	197	124265	0	4	4	1	1	0	1	1	3	0	0	1	1	1	0	1	0	1	1			0	0	0		66	0	4	4	5	5	2	4	1	1	3	4	1	1
171	0	https://youtu.be/NenDsK4AZgQ?si=XbE3bouG87gLvElG	Family Fun Life	12	30900	480	10	1	249	43920	325	138	463	1	1	0	1	1	3	1	1	1	1	1	0	1	0		1			0	0	0		77.78	0	3	2	3	1	5	1	1	1	1	1	1	1
172	0	https://youtu.be/XbUNOTTgQmE?si=Rs0y-4RUzAHYSxyK	Sumera Ali	48	9870	480	1	5	126	33020	135	1	136	10	1	0	1	1	3	1	0	0	1	1	0	1	0		1	1		0	0	1		60	33.33	3	4	2	5	4	4	4	1	4	3	1	1
173	0	https://youtu.be/lf8lsu-k8ic?si=uF465iS0UHu8v3Sn	MarShay JaCole	12	1660	480	11	3	1385	31881	1103	142	1245	10	0	0	1	1	2	1	1	1	1	0	0	0	0		1			0	1	0		55.56	33.33	2	2	1	1	5	1	1	1	1	1	1	1
174	0	https://youtu.be/bPv_plGBQwE?si=H9y-Q-JONPKE6mfD	Dr. Sam	12	75800	480	1	0	1089	75800	815	61	876	7	0	0	1	1	2	1	0	1	1	0	1	0	0	1	1	1		0	0	1		63.64	33.33	3	4	1	3	5	4	1	1	3	1	1	1
175	0	https://youtu.be/P4FWxEQJIZo?si=lVjHztbYRX9P1I87	imaging study	22	51100	480	13	0	2160	20119	531	26	557	7	0	0	1	1	2	1	1	0	0	1	1	1	1	1	1	1		0	0	0		81.82	0	4	4	1	4	5	4	1	1	3	3	1	1
176	0	https://youtu.be/WyqoaJFFOFs?si=Z-KyO7GCT_IeAxfu	Theresa Bowling	120	4830	480	2	0	33	19719	42	0	42	0	0	0	1	1	2	1	0	0	1	0	0	0	0		1	1		0	0	0		40	0	4	3	2	3	2	4	1	1	1	1	1	1
177	0	https://youtu.be/jXqVBGCuZVo?si=Arz_TlKuhdBkCLFw	WWCIHCharity	84	73000	480	7	0	236	18796	66		66	9	1	0	1	1	3	1	1	1	1	0	0	1	0		1	1		0	0	0		70	0	4	4	4	2	3	1	1	1	1	1	1	1
178	0	https://youtu.be/fDPUu31X0ms?si=HYRazpTN7W_x8-1l	health innovation oxford	84	5080	480	13	0	365	551312	0		0	10	0	0	1	1	2	1	1	1	1		0	1	0		1			0	0	0		75	0	3	4	4	2	3	1	1	1	2	3	1	1
179	0	https://youtu.be/iSKLAUNBYVo?si=SV803mVjh1yVB0LR	Lucy Mason	132	21	480	8	0	176	14800	44	4	48	10	0	0	1	1	2	1	1	1	1		0	1	0		1			0	0	0		75	0	4	4	3	3	2	3	1	1	2	3	1	1
180	0	https://youtu.be/oNOJm2IQoqQ?si=6LW3LZP__awunCeV	pnbsiva	168	1460	480	7	0	48	15557	21	0	21	0	0	0	1	1	2	1	0	0	0	0	0	0	0		1	1		0	0	1		30	33.33	3	3	1	2	1	1	1	1	2	1	1	1
181	0	https://youtu.be/BzA6Eq3vQkY?si=pTnaoYzu65m4Nxh0	AngeliqueSabrina	136	16700	480	8	0	590	12202	233	15	248	5	0	0	1	1	2	1	1	1	1	0	0	1	0		1			0	0	1		66.67	33.33	4	3	1	1	5	1	1	1	2	1	1	1
182	0	https://youtu.be/rNfyeDh_tio?si=CcUfjlwn8tFnohl1	Brian Coley	132	30700	480	1	3	117	11103	30	0	30	2	1	0	1	1	3	1	0	0	1	0	0	1	0	1	1			0	0	1		50	33.33	4	5	2	3	1	4	1	1	3	4	1	1
183	0	https://youtu.be/XLoro5xNMdg?si=wiw-wtiULHBvfKU-	Prof. George Taylor	108	11000	480	1	0	888	6943	134	4	138	7	0	0	1	1	2	1	0	0	0	1	1	0	0	1	1	1		0	0	1		54.55	33.33	5	5	1	4	2	5	4	1	1	1	1	1
184	0	https://youtube.com/shorts/pu25sI1Kw9o?si=O6aKPu1qtdQrN5Ee	Realdoc	46	230	480	1	0	12	6806	92	0	92	2	0	0	1	1	2	0	0	1	0	0	0	0	0	0	0	0		0	0	0		9.09	0	2	2	1	1	4	1	1	1	1	1	1	1
185	0	https://youtu.be/_XpPz9gpOiU?si=qxB4CfrGiJ52TXnL	Brian D.Coley	164	101000	360	1	0	2425	3702	108	4	112	2	1	0	1	1	3	0	0	1	0			1	0	1	1	1		0	0	1		55.56	33.33	5	5	1	5	4	5	3	1	2	4	1	1
186	0	https://youtu.be/ZBoLezacrxs?si=AX7sSX5JZHp_sALL	Kolesnichenko Yuriy Y.	108	731	480	1	1	7	3601	14	0	14	2	0	0	1	1	2	0	0	0	0	0	0	0	0	0	0	0		0	0	0		0	0	4	2	1	2	2	2	1	1	1	1	1	1
187	0	https://youtu.be/0eEMVZcx1Xo?si=_q5JDlZYXyhynMEN	Dr. Ben LaBrot’s non-profit organization	96	12100	360	13	3	180	3595	10	0	10	10	0	0	1	1	2	1	1	1	1	1	0	1	0	0	1	1		0	0	1		72.73	33.33	3	4	3	4	3	4	1	1	3	4	1	1
188	0	https://youtu.be/1AbVHGt-k8A?si=KtEb4rFw1IpmnBFB	Ultrasound HD	120	10200	480	13	0	2689	7156	34	0	34	2	0	0	1	1	2	1	0	0	0	1	1	0	1	1	1	1	1	0	0	1	1	66.67	50	2	5	1	4	2	5	4	1	3	3	1	1
189	0	https://youtu.be/0ILhdEbxWdw?si=M-CxfvJvyAEqIBJU	rdavidm1	132	10800	480	1	1	333	22427	114	6	120	2	0	0	1	1	2	1	0	0	1	0	0	0	0		1	1		0	1	1		40	66.67	3	3	1	3	2	4	1	1	1	1	1	1
190	0	https://youtu.be/UuHl6JyyAFM?si=tQDsvllCLvLN4WjL	rdavidm1	132	10800	480	1	1	135	37943	205	2	207	2	0	0	1	1	2	1	0	0	1	0	0	0	0		1	1		0	1	1		40	66.67	3	3	1	3	2	4	1	1	1	1	1	1
191	0	https://youtu.be/dFLPR_3j5wA?si=krzPzNbFVJPPwGca	Kolesnichenko Yuriy Y.	144	7260	480	1	1	62	1713	10	0	10	2	0	0	1	1	2	0	0	1	0	0	0	0	0			0		0	0	0		11.11	0	1	1	1	2	4	1	1	1	1	1	1	1
192	0	https://youtu.be/XlSEfEO9JL8?si=p5uTVIN9K6a_mt8n	Kolesnichenko Yuriy Y.	108	731	480	1	1	2	1466	3	0	3	5	0	0	1	1	2	0	0	1	0	0	0	0	0			0		0	0	0		11.11	0	4	1	1	1	2	1	1	1	1	1	1	1
193	0	https://youtu.be/BOsOedxDPz0?si=qjLfemL4Wfk7YafC	Ultrasound Board Review	48	15900	720	7	0	17	230	10	0	10	1	0	0	1	1	2	0	0	1	0	0	0	0	0			0		0	0	0		11.11	0	2	1	1	1	4	1	1	1	1	1	1	1
194	0	https://youtu.be/_m5Qn0RH7Ls?si=aduycPKEXqGrc4Mt	Susan D. John	48	8070	360	1	3	230	877	6	0	6	10	1	0	1	1	3	1	1	0	1	1	0	1	0	1	1			0	1	1		70	66.67	5	4	1	3	4	4	1	4	1	4	1	1
195	0	https://youtube.com/shorts/8DEE-9uFoUg?si=xx2TwBR0VQKcbqqL	Realdoc	46	230	480	1	0	5	879	18	0	18	2	0	0	1	1	2	0	0	1	0	0	0	0	0	0	0	0		0	0	0		9.09	0	4	4	1	1	4	1	1	1	2	1	1	1
196	0	https://youtu.be/zi0tquQMq7g?si=Dm0wnQzN1FLFWOWc	Sidra Medicine	72	2770	360	13	0	136	630	10	0	10	10	0	0	1	1	2	1	1	1	1		0	1	0		1			0	0	0		75	0	3	4	3	4	3	3	1	1	2	3	1	1
197	0	https://youtu.be/Av6Vy5JSUUk?si=riL5LzC7iypXVnBZ	Kolesnichenko Yuriy Y.	36	7260	480	1	1	36	611	16	8	24	3	0	0	1	1	2	0	0	1	0	0	0	0	0			0		0	0	0		11.11	0	1	1	1	1	4	1	1	1	1	1	1	1
198	0	https://youtu.be/tpI0wYxvj2k?si=QvqWTaWdHgz8RdOC	Kolesnichenko Yuriy Y.	108	731	480	1	1	5	596	3	0	3	5	0	0	1	1	2	0	0	1	0	0	0	0	0			0		0	0	0		11.11	0	4	1	1	1	2	1	1	1	1	1	1	1
199	0	https://youtu.be/SP4xKKzk8nw?si=DJNEVkx0PeOe1hT6	Kolesnichenko Yuriy Y.	12	7260	480	1	1	39	598	13	0	13	0	0	0	1	1	2	0	0	1	0	0	0	0	0			0		0	0	0		11.11	0	1	1	1	1	5	1	1	1	1	1	1	1
200	0	https://youtu.be/Imnude6E-Ro?si=gDg0O0tBMEXEytrR	Kolesnichenko Yuriy Y.	12	731	480	1	1	18	593	5	0	5	3	0	0	1	1	2	0	0	1	0	0	0	0	0			0		0	0	0		11.11	0	4	2	1	1	5	1	1	1	1	1	1	1
201	0	https://youtu.be/6k6EQ0rFYkM?si=PxwG9kZs9D-tVKhP	Kolesnichenko Yuriy Y.	12	7260	480	1	1	21	1289	15	0	15	1	0	0	1	1	2	0	0	1	0	0	0	0	0			0		0	0	0		11.11	0	1	1	1	1	5	1	1	1	1	1	1	1
202	0	https://youtu.be/R9zVBzNSFoU?si=4aFB3iZHX_wLCKoj	Kolesnichenko Yuriy Y.	60	7260	480	1	1	18	1241	9	0	9	6	0	0	1	1	2	0	0	1	0	0	0	0	0			0		0	0	0		11.11	0	1	1	1	1	4	1	1	1	1	1	1	1
203	0	https://youtu.be/MAE7CJVirqs?si=_QRSQhzWZA12Q_Qa	Russ Horowitz	12	121000	480	3	1	2893	1612	40	0	40	2	0	0	1	1	2	1	0	0	0			1	0	1	1	1		0	0	1		55.56	33.33	4	4	1	4	4	1	1	1	1	1	1	1
204	0	https://youtu.be/uIDfQ-k5kk0?si=LJm-gnjY7O1kbY6U	Kolesnichenko Yuriy Y.	8	7260	480	1	1	53	991	22	3	25	3	0	0	1	1	2	0	0	1	0	0	0	0	0			0		0	0	0		11.11	0	1	1	1	1	4	1	1	1	1	1	1	1
205	0	https://youtu.be/0XWO3xVIbYg?si=U1CmJsIz7ngo1C20	Shreetish Official	10	15	480	10	1	75	1165	6	0	6	10	0	0	1	1	2	0	0	1	0	0	0	0	0		0	0		0	0	0		10	0	1	1	1	1	5	1	1	1	1	1	1	1
206	0	https://youtu.be/1YCzodUZnWQ?si=ea_hpp8iVtrxYDEi	Gulfcoast Ultrasound Institute	108	32800	480	13	3	57	1115	0	1	1	10	0	0	1	0	1	0	1	1	0	0	1	1		1		1		1	1	1		66.67	100	4	4	1	5	2	4	1	1	1	1	1	1
207	0	https://youtu.be/Z_WB0Vimnh0?si=oBV_1katJ2EY-CuZ	Egyptian Union of Pediatricians	12	30200	720	13	0	1177	1441	56	2	58	4	1	0	1	1	3	1	0	0	1		0	1	1	1	1	1		0	0	1		70	33.33	5	5	1	4	5	5	4	1	5	4	1	1
208	0	https://youtu.be/uRASNmvDiDA?si=i6Hl4beUvTKEed1w	Kolesnichenko Yuriy Y.	24	7260	480	1	1	9	416	5	5	10	5	0	0	1	1	2	0	0	1	0	0	0	0	0			0		0	0	0		11.11	0	1	1	1	1	4	1	1	1	1	1	1	1
209	0	https://youtu.be/wMvISQhhIeQ?si=qPIIsPakx7IZD_G1	Emergency and Clinical Ultrasound	24	471	360	13	0	2299	734	4	0	4	1	1	0	1	1	3	1	0	0	1	1	1	1	1	1	1	1		0	1	1		81.82	66.67	2	4	1	4	4	4	3	1	3	3	1	1
210	0	https://youtu.be/It-MU9sC15s?si=VPWcZksGKmUDmaht	All about Ultrasound	48	628	480	13	1	48	720	6	0	6	5	0	0	1	1	2	1	0	1	0	0	0	1	0	1	0	1		1	1	1		45.45	100	4	4	1	1	4	1	1	1	1	1	1	1
211	0	https://youtu.be/Szser_8ZHHA?si=IrhZB1-ZtgQyrgJX	Ultrasound Board Review	24	15900	480	7	0	19	506	4		4	1	0	0	1	1	2	0	0	1	0	0	0	0	0			0		0	0	0		11.11	0	4	3	1	1	4	1	1	1	1	1	1	1
212	0	https://youtu.be/xIq8VHtXglQ?si=hkLlSk3a_GAflVtY	Ultrasound Board Review	24	15900	480	7	0	64	1547	14		14	2	0	0	1	1	2	1	1	0	0	1	1	1	0	1	1	1		1	1	1		72.73	100	4	4	1	4	4	4	1	1	4	1	1	1
213	0	https://youtu.be/KgBVN9midNs?si=NAJ0UK8bKOjIU-hy	Ultrasound Board Review	34	15900	480	7	1	1102	2580	36		36	10	0	0	1	1	2	0	0	0	1	1	1	1	0	1	1	1		1	1	1		66.64	100	5	5	1	3	4	5	1	1	1	1	1	1
214	0	https://youtu.be/40umI6V8DkU?si=rDnUsmJ_GZ0v3hwi	Ultrasound Board Review	24	15900	480	7	1	1167	983	9		9	10	0	0	1	1	2	0	0	0	1	1	1	1	0	1	1	1		1	1	1		66.64	100	5	5	1	3	4	5	1	1	1	1	1	1
215	0	https://youtu.be/jTUxgLytPfE?si=PIANLhOlrbCGtLNF	Ultrasound Board Review	24	15900	480	7	1	1285	618	7		7	10	0	0	1	1	2	0	0	0	1	1	1	1	0	1	1	1		1	1	1		66.64	100	5	5	1	3	5	5	1	1	1	1	1	1
216	0	https://youtu.be/llqpKIyBzzM?si=OaiM2hzbcy5GcWGu	Vsevolod Lykhin	43	4680	360	3	1	249	1133	34	2	36	9	0	0	1	1	2	1	0	0	1	1	0	0	0		0	1		0	1	1		40	66.67	5	4	1	2	4	4	1	3	1	1	1	1
217	0	https://youtu.be/j3ITAo5TaDs?si=Ib08VFh-35GubGi3	William E. Shiels	84	101000	240	1	0	2196	891	2	0	2	8	1	0	1	1	3	1	1	0	1	1	1	1	1	1	1	1		0	1	1		90.91	66.67	5	5	1	5	3	4	4	1	3	5	1	1
218	0	https://youtube.com/shorts/RRVmrV922Xs?si=67jjl2dF1mVY1mXM	Chison	12	874		7	0	47	794	11		11	5	0	0	1	1	2	0	0	1	0	1	0	0	0			0		0	1	1		22.22	66.67	2	1	1	1	5	1	1	1	1	1	1	1
219	0	https://youtu.be/d_Ga5_DZtBA?si=bCaKzA5kvvFwsYYA	Kolesnichenko Yuriy Y.	24	7260	480	1	1	15	730	14	0	14	7	0	0	1	1	2	0	0	1	0	0	0	0	0			0		0	0	0		11.11	0	1	1	1	1	5	1	1	1	1	1	1	1
220	0	https://youtu.be/lL380VvQP_Y?si=hpD_C0KIDHv82r3t	Kolesnichenko Yuriy Y.	24	732	480	1	1	75	413	5	0	5	3	0	0	1	1	2	0	0	1	0	0	0	0	0			0		0	0	0		11.11	0	4	4	1	1	4	3	1	1	2	1	1	1
221	0	https://youtu.be/o6tE-ZihU2U?si=urNgIk47J7nGnrYg	Sonographic Tendencies	37	65400	1080	13	0	354	28716	508	9	517	2	1	1	1	1	4	1	1	1	1	1	0	1	1	1	1	1	1	1	1	1	1	91.67	100	4	4	2	4	4	4	3	1	3	1	1	1
222	0	https://youtu.be/dbFqII-yPII?si=0_ZFUpYKn1Re5ent	123sonography	67	79700	1080	7	0	71	27585	31	1	32	10	1	0	1	1	3	1	1	1	0	1	1	1	0	1		1		1	1	0		80	66.67	3	2	2	5	3	2	5	1	1	1	1	1
223	0	https://youtu.be/XUsfGNnshsM?si=R2BrWkfFFYS_kf3v	Imaging Study	31	51200	1080	13	1	118	22065	366	19	385	1	1	0	1	1	3	1	1	0	1	1	0	1	0	1	1	1	1	1	1	1		75	100	5	3	2	4	5	4	2	1	3	1	1	1
224	0	https://youtu.be/PlJiKJkAiF4?si=W6bcvr2Qa90IWzNt	Gulfcoast Ultrasound Institute	85	32800	720	13	0	211	13006	193	1	194	2	1	0	1	1	3	1	1	0	1	1	0	1	0		1	1		1	1	1		70	100	4	4	2	4	3	4	3	3	4	5	1	1
225	0	https://youtu.be/6dmPgTCL_-0?si=4ilrkUOcw0AwiLkD	For Medical Sonography Professionals	39	731	480	13	0	123	4859	63	4	67	2	1	0	1	1	3	0	0	1	0	1	0	0	0			0		0	0	0		22.22	0	3	2	1	3	4	4	1	1	2	1	1	1
226	0	https://youtu.be/mEU1r1ZkpgE?si=LZWFw2qUfaUjqIlZ	Noreddine Bouarroudj	90	2810	720	1	1	151	1618	4	0	4	2	0	0	1	1	2	0	0	1	0	0	0	0	0			0		0	0	0		11.11	0	3	1	1	2	3	2	2	1	1	1	1	1
227	0	https://youtu.be/X5EIq_1H5kE?si=iMJjZwKIo25l_-a_	The Merry Misadventures Family	5	1620	1440	10	1	865	1597	45	17	62	7	1	0	1	1	3	1	1	1	1	1	0	1	0		1	1		1	0	1		80	66.67	4	4	4	4	5	3	1	3	2	3	2	3
228	0	https://youtu.be/sJlCGLFej-g?si=GLq9dz518Cjhv4j6	SCCM	78	15700	720	7	0	60	1593	4	0	4	10	1	0	1	1	3	1	1	1	0	1	1	1	0	1		1		1	1	0		80	66.67	2	2	2	4	3	1	5	1	1	3	1	1
229	0	https://youtu.be/A-cItC2-CYA?si=3oMfapsfaGvlW25W	Для врачей УЗИ	30	7260	480	1	1	11	447	6	2	8	2	0	0	1	1	2	0	0	1	0			0				0		0	0	0		16.67	0	2	2	1	2	4	3	1	3	1	1	3	1
230	0	https://youtu.be/OV9M7Jze5B8?si=GzJUu0AJORkz8zZj	Для врачей УЗИ	44	7260	480	1	1	44	1414	28	3	31	9	0	0	1	1	2	0	0	1	0			0				0		0	0	0		16.67	0	2	2	1	2	4	3	1	1	2	1	1	1
231	0	https://youtu.be/j00VuuJbvyc?si=E49CSd8UuZj9ok4-	Ultrasound Board Review	51	15900	1080	7	0	40	274	4		4	7	0	0	1	1	2	0	0	1	0			0				0		0	0	0		16.67	0	3	3	1	3	4	3	3	1	2	1	1	1
232	0	https://youtu.be/9JeDsja9NGk?si=RHJEQfuhbSzw1uKR	Ultrasound Board Review	51	15900	1080	7	0	104	136	2		2	9	0	0	1	1	2	0	0	1	0	0	0	0	0			0		0	0	0		11.11	0	1	1	1	1	4	3	2	1	1	1	1	1
233	0	https://youtu.be/kXPA6g5MtZs?si=m9dyrkCqSllwVGjD	Ultrasound Board Review	52	15900	1080	7	0	63	99	2		2	2	0	0	1	1	2	0	0	1	0	0	0	0	0			0		0	0	0		11.11	0	1	1	1	1	4	3	2	1	1	1	1	1
234	0	https://youtu.be/QSMs1kY5kNs?si=pUhgMTXQxaJsLN_9	Ultrasound Board Review	54	15900	1080	7	0	34	190	3		3	2	0	0	1	1	2	0	0	1	0			0				0		0	0	0		16.67	0	1	1	1	1	4	3	2	1	1	1	1	1
235	0	https://youtu.be/KEW6s3f9QsI?si=YGyCb9v96zYPLmII	Ultrasound Board Review	54	15900	1080	7	0	35	49	0		0	9	0	0	1	1	2	0	0	1	0			0				0		0	0	0		16.67	0	1	1	1	1	4	3	2	1	1	1	1	1
236	0	https://youtu.be/4Y_xLzlyn9Y?si=Dfr-AmCTG1RKUNBm	Ultrasound Board Review	54	15900	1080	7	0	35	76	1		1	9	0	0	1	1	2	0	0	1	0			0				0		0	0	0		16.67	0	1	1	1	1	4	3	2	1	1	1	1	1
237	0	https://youtu.be/KFXMAsARQc4?si=2LHEL_FBFfZcfMgV	Для врачей	22	7260	480	1	1	24	446	9	1	10	1	0	0	1	1	2	0	0	1	0			0				0		0	0	0		16.67	0	3	3	1	4	5	3	1	1	2	1	1	1
238	0	https://youtu.be/leBi7h_VJtI?si=Ut8yF5Dsna00ABmd	Ultrasound Board Review	54	15900	1080	7	0	25	36	0		0	1	0	0	1	1	2	0	0	1	0			0				0		0	0	0		16.67	0	1	1	1	1	4	3	2	1	1	1	1	1
239	0	https://youtu.be/iSnZYNboeg0?si=7sNejw1XoimbXpy9	Ultrasound Board Review	58	15900	1080	7	0	34	74	1		1	6	0	0	1	1	2	0	0	1	0			0				0		0	0	0		16.67	0	1	1	1	1	4	3	2	1	1	1	1	1
240	0	https://youtu.be/PITXX2lI6ps?si=ovw6enXw7sgRb2ZB	Ultrasound Board Review	58	15900	1080	7	0	29	63	1		1	2	0	0	1	1	2	0	0	1	0			0				0		0	0	0		16.67	0	1	1	1	1	4	3	2	1	1	1	1	1
241	0	Pediatric Intussusception Emergency (Bowel Obstruction) - YouTube	Larry B.Mellick, MD	132	649000	1080	0	0	91	122975	470	0	470	8	1	1	1	1	4	1	1	1	1	1	0	1	0	1	1	1		1	1	0		81.82	66.67	1	3	4	3	2	3	1	1	1	1	1	1
242	0	Echo Test at Children’s Hospital - What to Expect - YouTube	Erlanger Health	48	4100	1080	13	3	160	101176	347	0	347	5	1	1	1	0	3	1	1	1	1	1	0	1	0		1	1		1	1	1		80	100	1	1	1	3	4	2	1	1	3	1	1	1
243	0	Hip Ultrasound - YouTube	Sonographic tendencies	84	65200	720	1	0	532	99443	1347	25	1372	0	0	1	1	1	3	1	0	0	1	1	1	1	1	1	1	1	1	1	1	0	1	83.33	75	5	3	2	4	3	3	1	2	4	4	4	1
244	0	Intussusception Diagnosis and Treatment - YouTube	Larry B.Mellick, MD	108	650000	480	0	1	349	93548	790	0	790	8	1	0	1	1	3	1	1	1	1	1	0	1	0	1	1	1	1	1	1	0	1	83.33	75	4	5	3	5	2	5	1	2	4	4	1	1
245	0	How To: Ultrasound Guided Insertion of a Femoral Vein Catheter 3D Video - YouTube	Sonosite	144	121000	480	12	0	94	91612	305	1	306	9	0	1	1	0	2	1	1	1	0	1	0	0	0		1	1		1	1	1		60	100	4	4	1	3	1	3	1	1	4	1	1	1
246	0	Having a Children's ultrasound appointment in Hospital - Patient Guide - YouTube	Helath Innovation Oxford	84	5070	720	0	3	365	551011	0	0	0	10	1	0	1	0	2	1	1	1	1	1	0	1	0		1			1	1	1		77.78	100	4	4	5	5	3	3	2	3	5	4	4	3
247	0	Point-of-care ultrasound leads to more efficient and accurate diagnoses in SickKids emergency - YouTube	The Hospital for Sick Children (SickKids)	96	82700	720	0	0	308	306549	760	0	760	9	1	0	1	1	3	1	1	1	1	1	0	1	0		1			1	1	0		77.78	66.67	4	3	4	5	3	4	1	4	3	4	2	1
248	0	Children's Heart Centre Journey - YouTube	belfast health and social care trust	36	4600	720	13	3	174	167191	656	13	669	5	1	0	1	0	2	1	1	1	1	1	0	1	0		1			1	1	1		77.78	100	2	2	2	3	4	2	1	1	3	1	1	1
249	0	Ultrasound of the Neonatal Head and Spine | GE Healthcare - YouTube	GE Health Care	96	87000	720	0	0	3305	94639	873	0	873	7	1	0	1	1	3	1	0	1	1	1	1	0	1	1	0	1		1	1	1	1	72.73	100	4	4	1	5	3	5	2	4	5	3	2	1
250	0	Ultrasound Training: Pediatric Brain - YouTube	SIMTICS	156	39700	480	7	0	180	86470	313	13	326	7	0	0	1	1	2	0	0	0	0	1	0	1	0		1	1		1	1	1		40	100	4	2	1	3	1	3	1	1	3	1	1	1
251	0	https://youtu.be/sP397Ddo_v0?si=EVgrpos6CK9Vixpk	Texas Children's Hospital	132	41400	720	3	3	185	61709	166	8	174	5	1	1	1	0	3	1	1	1	1	1	0	0	0		1			1	1	0		66.67	66.67	4	3	3	5	1	3	1	2	3	5	3	1
252	0	https://youtu.be/F3s_Jh29H5w?si=GkGpKmCVzDciqMRF	123 sonography	60	79600	720	7	0	783	26055	119	1	120	10	0	1	1	0	2	1	0	0	0	1	1	0	0	1	1	1	1	1	1	1	1	58.33	100	4	4	3	4	3	3	4	2	4	5	2	1
253	0	https://www.youtube.com/watch?v=D0-Od-da4LA	IR education	54	13400	720	1	0	323	3148	13	0	13	0	1	1	1	1	4	1	0	0	0	1	1	1	0	1	1	1	1	1	1	1	1	66.67	100	4	3	3	3	3	4	2	2	2	3	3	1
254	0	https://youtu.be/IT91wm8nw58?si=YC1USasjHkUl_wpe	Morgan Ashley	15	2030	720	3	4	596	24433	314	120	434	10	1	1	1	1	4	1	1	1	1	0	0	1	0		1			1	1	0		66.67	66.67	4	4	2	3	5	2	1	5	3	1	5	1
255	0	https://youtu.be/zsjYq7SN1QU?si=m5hqyZvgO2N7s5Fi	Queensland X-Ray	48	1070	720	13	4	169	24036	109	14	123	10	1	1	1	0	3	1	1	1	0	0	0	1	0		1			1	1	1		55.56	100	4	5	5	4	4	4	1	3	4	4	3	1
256	0	https://youtu.be/v68o376KtLU?si=-tWJytNmdBjI64Vf	Mastering & Guidelines in Ultrasound & Echo-Card	12	32600	720	3	0	120	22764	131	5	136	5	1	0	1	0	2	0	0	0	1	1	1	1	0	1	1	1	1	1	1	0	0	66.67	50	3	2	1	3	5	4	2	1	2	1	1	1
257	0	https://youtu.be/DNPx-XrdCuQ?si=fLKufLsGtDmz2xwH	SIMTICS	160	39700	480	7	0	180	52448	135	7	142	2	1	0	1	0	2	0	1	1	0	1	0	1	0		1			1	1	1		55.56	100	3	4	5	4	1	4	3	3	3	1	2	1
258	0	https://youtu.be/u1J1F1S1quQ?si=Znpv2Tcd4SBRJ-Dv	Pediatric Echo gallery	12	3840	720	0	0	68	10129	289	15	304	5	0	0	1	1	2	1	0	0	1	1	1	1	0	1	1	1		1	1	1		72.73	100	2	3	1	2	5	4	1	3	2	1	3	1
259	0	https://youtu.be/3DmkZh09A0I?si=j2Z1hkKH02d9Guil	Children's Nebraska	48	5740	360	0	0	1019	9816	83	0	83	5	1	0	1	0	2	1	1	1	1	1	0	0		1	1	1		0	1	1		80	66.67	4	3	3	4	4	3	1	2	4	3	2	1
260	0	https://youtu.be/ipkAb5RHF_M?si=87gbsDn1ibnOIfBc	SM Echo	12	2820	720	3	0	2353	9770	150	5	155	5	1	0	1	1	3	1	0	0	1	1	1	1	0	1	1	1	1	1	1	1	1	75	100	4	3	2	4	5	4	1	3	4	4	2	2
261	0	https://youtu.be/GCv1WYwDf90?si=KSVlubu5YusQ_Jxq	Focused Ultrasound Foundation	84	4270	720	9	1	212	5359	53	0	53	9	1	1	1	1	4	1	1	0	1	1	0	1	0		1			1	1	1		66.67	100	4	3	3	3	3	3	1	3	2	4	2	1
262	0	https://youtu.be/02rPiDnfle4?si=ri-q1-GaFxGAfjQQ	SIMTICS	156	39700	480	7	0	180	22093	49	0	49	6	1	0	1	0	2	1	0	0	0	1	1	1	0		1	0		1	1	1		50	100	3	2	2	3	1	4	3	1	2	3	1	1
263	0	https://youtu.be/_C5XRaHsFAA?si=BnykPxx-7DypfADK	lolgeselle	24	17500	720	1	4	560	5228	239	96	335	10	1	0	1	1	3	1	1	1	1	1	0	1	0		1			1	1	0		77.78	66.67	3	2	2	3	4	1	2	3	2	1	1	1
264	0	https://youtu.be/LO_a4hmClzE?si=uXuAYuNNIzwc-VcW	Pediatrics Department - Ain Shams University - YouTube	29	12700	360	1	0	1800	403	13	0	13	9	1	1	1	1	4	0	0	1	1	1	1	1	0	1	0	1	1	1	1	1	1	66.67	100	2	4	2	4	4	4	1	1	3	4	1	1
265	0	https://youtu.be/qP9dw6IzHQU?si=V10kI1KZoaHxK3sk	UltraSound HD	120	10200	480	1	0	2689	3930	22	2	24	8	0	1	1	1	3	1	0	0	1	1	1	1	0	1	1	1	1	1	1	1	1	75	100	3	3	2	3	2	4	1	1	3	5	2	3
266	0	https://youtu.be/EMwPfpywHHA?si=zLYoe0q9CD-UomKt	For medical sonography professionals	14	733	480	1	1	30	395	2	0	2	9	0	1	1	1	3	0	0	1	0			0				0		0	1	0		16.67	33.33	3	2	1	2	5	4	2	1	2	1	1	1
267	0	https://youtu.be/GF9QVyyQI1Q?si=CVe9H-6mrCifWad2	Pediatric Ultrasound Multisite Conference	1	703	360	1	1	3600	439	25	1	26	9	1	1	1	1	4	1	0	0	1	1	1	1	0	1	1	1	1	1	1	1	1	75	100	3	3	1	4	5	4	1	2	3	5	2	1
268	0	https://youtu.be/jAI9PBfPB_Q?si=cyKnygl43_OesFjv	lolgeselle	12	17500	720	1	0	208	3606	73	10	83	2	1	0	1	1	3	1	0	0	1	0	0	1	0		1	1		1	1	1		50	100	3	2	1	4	5	4	1	1	3	4	1	1
269	0	https://youtu.be/Ry48bf0wHx4?si=ie2-fjtYHd1nWI1S	Для врачей	30	7260	480	1	1	38	424	9	1	10	0	0	1	1	1	3	0	0	1	0			0				0		1	0	0		16.67	33.33	2	1	1	3	4	3	1	1	1	1	1	1
270	0	https://youtu.be/O4S5aXA_krY?si=ojceRhQBVZCCfDkq	For medical sonography professionals	36	730	480	1	0	39	3425	26	7	33	6	1	1	1	1	4	0	0	1	0			0			0	0		0	1	0		14.29	33	2	2	1	3	4	3	1	1	1	1	1	1
271	0	https://youtu.be/BYslxhzHBjE?si=cQUcWE_PDSjdT6hh	Для врачей	3	7260	480	1	1	40	818	14	4	18	4	0	1	1	1	3	0	0	1	0			0			0	0		0	1	0		14.29	33	2	2	1	2	4	3	1	1	2	1	1	1
272	0	https://youtu.be/HT-p824Whq0?si=faOJdz8nUobuFh2d	Для врачей	11	7260	480	1	1	72	807	19	0	19	0	0	1	1	1	3	0	0	1	0	0	0	0	0		0	0		0	1	0		10	33.33	2	2	1	2	5	3	1	1	2	1	1	1
273	0	https://youtu.be/afXcZXLUl18?si=U-SvTECGDwjbhhAX	Nationwide Children's	24	98900	720	3	3	83	749	5	0	5	10	1	1	1	1	4	1	1	1	1	1	0	1	0		1			1	0	0		77.78	33.33	3	3	3	5	5	3	2	1	4	4	1	1
274	0	https://youtu.be/GbsxPa69GJo?si=R5h-YPXeQulEUYrg	Для врачей	22	7260	480	1	1	15	715	9	2	11	9	0	1	1	1	3	0	0	1	0			1		1		0		0	0	0		42.86	0	2	2	1	2	5	3	1	1	2	1	1	1
275	0	https://www.youtube.com/live/NTwWQ86n974?si=3mHJ98C2M_fkO7Gw	samaritans pure international health forum	60	1420	720	0	0	3460	702	14	0	14	8	1	1	1	1	4	1	1	0	1	1	1	1	0	1	1	1		1	1	1		81.82	100	3	4	3	4	4	3	2	2	5	5	1	2
276	0	https://youtu.be/qzsNkCjVw2Y?si=uWY7FASMxlSTbXX6	Для врачей	24	7260	480	1	1	18	693	7	0	7	1	0	1	1	1	3	0	0	1	0			0				0		0	0	1		16.67	33.33	2	2	1	2	5	3	1	1	2	1	1	1
277	0	https://youtube.com/shorts/2YLvMBbswPU?si=pHG9AoXso_RrBbf8	Brooke Peds Sonographer	0	1010	720	1	4	9	2019	37	2	39	10	1	0	1	1	3	0	0	1	0			0						0	0	0		20	0	1	1	1	1	5	1	1	1	1	1	1	1
278	0	https://youtu.be/9SBRqtVcLoQ?si=CYWSjUy5YyB5jlxj	Для врачей	26	7260	480	1	1	16	671	7	0	7	6	0	1	1	1	3	0	0	1	0			0				0		0	0	0		16.67	0	2	2	1	2	5	3	1	1	2	1	1	1
279	0	https://youtu.be/TwJzidHGkcc?si=DE8Z_Ykk0zD0K2TS	Для врачей	48	7260	480	1	1	120	673	15	4	19	1	0	1	1	1	3	0	0	1	0	0	0	0	0			0		0	0	0		11.11	0	2	2	1	2	4	3	1	1	2	1	1	1
280	0	https://youtu.be/Ecm0i1vkD0Q?si=7FdmowYs5FNs9ZdL	Для врачей	24	7260	480	1	1	17	633	13	0	13	2	0	1	1	1	3	0	0	1	0			0				0		0	0	0		16.67	0	2	2	1	2	4	3	1	1	2	1	1	1
281	0	https://youtu.be/A2g9e9k6yaU?si=mJJGQS7aIwoVuXDP	Greg Zahn	24	1660	720	3	1	196	559	12	1	13	8	1	1	1	1	4	1	0	0	1	1	1	1	0	1	1	1	0	1	1	1		66.67	100	3	4	3	4	5	4	1	3	3	3	1	1
282	0	https://youtu.be/YzZr7pYgHlE?si=eWD7vMHrGjK4owkR	For medical sonography professionals	24	733	480	1	1	30	391	5	2	7	2	0	1	1	1	3	0	0	1	0			0				0		0	1	0		16.67	33.33	2	2	1	3	5	3	2	1	2	1	1	1
283	0	https://youtu.be/Lz89fiy8gnU?si=PHp6X__5rprirUnI	SCCM	105	15700	480	7	0	59	543	3	0	3	10	1	1	1	0	3	0	1	1	0		1	1		1				1	1	0		71.43	66.67	2	2	2	4	3	1	5	1	1	3	1	1
284	0	https://youtu.be/gQYASJV_3UM?si=D264g4bzy4QvHkNP	Для врачей	3	7260	480	1	1	83	900	24	1	25	0	0	1	1	1	4	0	0	1	0	0	0	0	0			0		1	0	0		11.11	33.33	2	2	1	2	5	3	1	1	2	1	1	1
285	0	https://youtu.be/ZcEY1uhgaXA?si=-5QcrnpXV-HHS70a	AAPM&R	84	771	720	1	0	120	1035	2	0	2	0	0	1	1	1	3	1	1	0	1	1	0	1	0	1	1	1	1	1	1	1		75	100	1	1	1	2	3	3	1	1	1	1	1	1
286	0	https://youtu.be/aebcJSjerKk?si=hPTL73-c6iIMRffz	Ultrasound Ireland: Medical, Pregnancy Scans & IVF Fertility Scans	60	76600	720	13	3	63	533	2	0	2	10	1	1	1	0	3	1	1	1	1	1	0	1	0	1	1	0		1	1	1		72.73	100	3	3	3	3	4	1	1	1	1	1	1	1
287	0	https://youtu.be/OgzO_a_6N_4?si=IVgXpLxiuecREwch	AIUMultrasound	36	30700	720	1	0	276	491	6	1	7	9	1	1	1	1	4	1	1	0	1	1	1	1	1	1	1	1		1	1	1		90.91	100	4	3	2	3	4	3	1	1	3	5	2	1
288	0	https://youtu.be/i-i2VEkj-j8?si=XiEMNDk4qBy5hUQI	Greg Zahn	36	1670	1080	3	1	467	491	18	3	21	8	0	1	1	1	3	1	1	0	1	1	1	1	0	1	1	1		1	1	1		81.82	100	3	3	1	4	4	4	1	5	3	5	4	4
289	0	https://youtu.be/NNZnbvWU3fk?si=PYGAvVFKYQI1_lPr	Для врачей	48	7260	480	1	1	5	478	4	0	4	2	0	1	1	1	3	0	0	0	0			0		1		0		0	0	0		14.29	0	2	2	1	2	4	3	1	1	1	1	1	1
290	0	https://youtube.com/shorts/HbqMy69MM8o?si=mHJen-jh9MDn8pXu	레닥 realdoc_소아초음파	34	230	720	1	0	33	477	9	0	9	3	0	1	1	1	3	0	0	1	0			0				0		0	1	0		16.67	33.33	2	2	1	2	4	3	1	1	1	1	1	1
291	0	https://youtu.be/6KAJnhYfnwY?si=Kr9JtJB7r-Gx24df	Для врачей	12	7260	480	1	1	17	479	11	2	13	8	0	1	1	1	3	0	0	1	0			0				0		0	1	0		16.67	33.33	2	2	1	2	5	3	1	1	1	1	1	1
292	0	https://youtu.be/LZ2KxfrwQig?si=Mii1MLEXI563QTIG	ultrasound videos	23	4250	1080	1	1	56	473	11	0	11	1	0	1	1	1	3	0	1	0	1			0	0	1	0	0		0	1	0		33.33	33.33	3	2	1	3	5	3	2	1	2	1	1	1
293	0	https://youtu.be/Y5BoX-c-DjQ?si=dsue9mg-VfirkdfG	Для врачей	23	7260	480	1	1	46	473	13	0	13	9	0	1	1	1	3	0	0	1	0			0				0		1	0	0		16.67	33.33	2	2	1	2	5	3	1	1	2	1	1	1
294	0	https://youtu.be/ba4TLdxQoj0?si=VJ5VtBEp-3dxkyzS	ARA Diagnostic Imaging	96	16900	480	1	2	320	467	2	0	2	10	1	1	1	1	4	1	1	1	1	1	0	1	0		1	1		1	0	1		80	66.67	2	2	3	3	2	3	1	1	2	3	1	1
295	0	https://youtu.be/GbcevGRc2qU?si=SUVOVj2irJfqV76P	Для врачей	61	7260	480	1	1	16	462	3	0	3	0	0	1	1	1	3	0	0	1	0			0				0		1	0	0		16.67	33.33	2	2	1	2	4	3	1	1	2	1	1	1
296	0	https://youtu.be/3xbOkqJycN4?si=aKianQqNMSSoZD9v	Для врачей	24	7260	480	1	1	13	460	11	0	11	1	0	1	1	1	3	0	0	1	0			0				0		1	0	0		16.67	33.33	2	2	1	2	5	3	1	1	2	1	1	1
297	0	https://youtu.be/fC0-RWFn6x4?si=hdeBj8U68eObbCjh	Gulfcoast ultrasound Institute	84	32800	720	6	0	59	456	0	0	0	10	1	1	1	0	3	1	1	1	0	1	1	1		1				1	1	1		87.5	100	2	2	2	3	3	2	4	1	1	1	1	1
298	0	https://youtu.be/NhXt4iqx1Qc?si=L70lMKx1XhrIlKmF	Mohamed Soliman	12	5280	720	1	1	127	459	33	1	34	9	0	1	1	1	3	1	0	0	0	1	1	1	0	1		1		1	1	1		60	100	3	4	3	3	5	4	1	1	4	5	1	1
299	0	https://youtube.com/shorts/8FUFipRNPdI?si=tEX0FUHXotf39Dd5	ultrasound board review	43	1590	720	13	0	43	450	15	0	15	5	0	1	1	1	3	1	0	0	0	1		0		0		0		1	1	0		25	66.67	3	2	1	2	4	3	1	1	1	1	1	1
300	0	https://youtu.be/9xTmDiflu3A?si=gOHJlBEWqvY4Bdz_	Для врачей	24	7260	480	1	1	91	447	10	2	12	0	0	1	1	1	3	0	0	1	0	1	0	0	0			0		1	1	0		22.22	66.67	2	2	1	2	4	3	1	1	2	1	1	1
301	0	https://youtu.be/Oe8pr7oPFRs?si=bRvVrVXmch5H5lfh	OfficialGetWellSoon	9	62500	720	7	0	179	12629	51		51	10	1	0	1	1	3	1	1	1	1	1	0	0	0		1	1		1	0	0		70	33.33	3	3	3	1	5	2	1	1	2	1	1	1
302	0	https://youtu.be/SMZxIOFuMXM?si=6GuTq79JLT2U4OVA	SIMTICS	160	39700	480	7	0	180	39210	96	5	101	6	0	0	1	0	1	1	0	0	0	1	0	0	0		1	1		1	1	1		40	100	4	4	4	4	1	4	1	1	5	4	1	1
303	0	https://youtu.be/KxwQdU1-Nno?si=vYs7e6uC3MI_DEfz	SIMTICS	160	39700	480	7	0	180	127895	407	4	411	6	0	0	1	0	1	1	0	0	0	1	0	0	0		1	1		1	1	1		40	100	5	5	4	4	1	4	1	1	5	4	1	1
304	0	https://youtu.be/nzVrAsGbXPY?si=JVIhonky64jWFASA	AscensionOrg	4	6590	720	12	0	91	180	0	0	0	9	1	0	1	0	2	1	0	0	1	1	0	1	0		1			1	0	1		44.44	66.67	2	3	2	4	5	3	1	1	2	4	1	1
305	0	https://youtu.be/RrsUypkSlXQ?si=6pUnvy71t4JREEmk	user-oz3ci3zv7	45	7270	480	7	1	54	2815	24	0	24	9	0	0	1	1	2	0	0	0	0		0	0	1			1		1	0	0		25	33.33	1	1	1	1	4	1	1	1	1	1	1	1
306	0	https://youtu.be/A4Raa9Ayvdk?si=L9hOcz-iFQ-yzZlL	RadiologyVideo	88	102000	240	1	0	2846	2545	20	2	22	8	1	0	1	1	3	1	0	0	1	1	0	1	1	1	1	0		1	1	1		63.64	100	4	5	1	4	4	5	4	1	4	4	1	1
307	0	https://youtu.be/fIR0CEFYzmU?si=yNLaoYTpcuQEHUBc	formedicalsonographyprofes7380	34	733	480	7	1	65	2421	31	0	31	2	1	0	1	1	3	1	0	0	0	0	0	1	1			1		1	0	1		44	66.67	4	2	1	3	4	1	1	1	1	1	1	1
308	0	https://youtu.be/cILYKiyrS_w?si=Fj0IY6B0T3gV9vqN	RadiologyVideo	42	102000	360	1	0	2425	2343	97	3	100	2	1	1	1	1	4	1	0	0	1	1	1	1	1	1	1	1	1	1	0	1	0	83.33	50	5	5	4	4	4	5	3	1	2	4	1	1
309	0	https://youtu.be/VGS3BpJsDRM?si=tBblXBCj7_rrVUyg	user-oz3ci3zv7	109	7270	480	7	1	22	2286	7	0	7	9	0	0	1	1	2	0	0	0	0	1	0	1	0			0		1	0	0		22.23	33.33	5	4	1	4	4	4	1	1	3	2	1	1
310	0	https://youtu.be/r0LXzbR_Dj8?si=bWb8AoO1xCnAogj_	krsradiology	14	1220	720	7	1	82	2319	58	1	59	2	0	0	1	1	2	1	0	0	0	1	1	1	1	1		1		1	1	1		70	100	4	2	1	3	5	4	1	1	3	1	1	1
311	0	https://youtu.be/QWa_VQitj4Q?si=5bnV5HHSS2svgwOT	JosephMinardi	43	12200	720	3	0	67	60480	371	10	381	1	1	0	1	1	3	1	0	0	1	0	0	1	0	1	1			1	0	1		50	66.67	3	3	1	3	4	3	1	1	2	1	1	1
312	0	https://youtu.be/zJJPxtnN0K0?si=sxw8UKQu4TyDrm41	RadiologyVideo	88	101000	240	1	0	1406	2135	29	0	29	6	1	0	1	1	3	1	0	0	1	1	0	1	1	1	1	1		1	0	1		72.73	66.67	5	5	2	5	3	4	4	1	3	3	1	1
313	0	https://youtu.be/ncRaAG9sw0A?si=ir54Hz9Vmsi_vlf6	user-oz3ci3zv7	6	7270	480	7	1	18	2179	24	0	24	3	0	0	1	1	2	1	0	0	0	1		0	1			0		1	0	0		37.5	33.33	3	1	2	2	5	2	2	1	1	1	1	1
314	0	https://youtu.be/neRvWvSya4Q?si=TdGOe8rrSRWFOYhO	formedicalsonographyprofes7380	109	733	480	7	1	8	1950	3	0	3	9	0	0	1	1	2	0	0	0	0			0				1		1	0	0		16.67	33.33	5	2	1	1	2	1	1	1	2	1	1	1
315	0	https://www.youtube.com/live/GKpDZwl3z8U?si=1oJVONYyMn88Z_Rq	pediatricradiologyacademy463	37	11000	720	1	0	5335	1799	47	0	47	2	1	1	1	1	4	1	0	0	1	1	1	1	1	1	1	1	1	1	1	1	1	83.33	100	5	5	2	4	4	4	4	1	3	3	1	1
316	0	https://youtu.be/OZOYyGPNqUg?si=rs65tLB-TF7OAoQK	user-oz3ci3zv7	61	7270	480	7	1	91	1764	22	6	28	1	0	0	1	1	2	1	0	0	0	1	0	0	1			1		1	0	0		44.44	33.33	1	1	1	1	4	1	1	1	1	1	1	1
317	0	https://youtu.be/M8U18G7TOWE?si=B6ZhJtDiMGDz2pNm	formedicalsonographyprofes7380	109	733	480	7	1	30	1732	11	6	17	2	0	0	1	1	2	0	0	0	0	1		0				1		1	0	0		28.57	33.33	2	1	1	1	2	1	1	1	1	1	1	1
318	0	https://youtu.be/EmESQfBb8aw?si=4SaM4lULCCaq-wMa	dr.ahmedbassiouny2932	33	2370	720	1	0	650	1742	66	1	67	0	1	0	1	1	3	1	0	0	1	1	0	1	0	1	1	1	1	1	0	1	1	66.67	75	5	3	1	4	4	4	1	1	3	1	1	1
319	0	https://youtu.be/JWFxeWrhEQ0?si=62A_ymyAua18908l	user-oz3ci3zv7	45	7270	480	7	1	29	1779	20	0	20	9	0	0	1	1	2	0	0	0	0	1		0				1		1	0	0		28.57	33.33	1	1	1	2	4	1	1	1	1	1	1	1
320	0	https://youtu.be/6QDx5TFbyLQ?si=vw7j8cDlg7VLZ25N	Sonosite	13	121000	720	3	0	2893	1714	42	0	42	3	1	0	1	1	3	1	0	0	1	1	1	1	1	1	1	1		1	1	1	1	81.82	100	5	5	1	5	5	4	3	1	4	4	1	1
[truncated: 5 more columns]

## Sheet: Legend
	Type_of_Social_Network	Type_of_creator	Purpose	Type _of_ultrasound
0	YouTube	Pediatrician	Technical/professional medical education	Musculoskeletal
1		Radiologist	Presentation of clinical cases	Nephrology
2		Rheumatologist	Divulgation of research news	Gastroenterology
3		Other physician	Promotion of diagnostic services	Endocrinology
4		Radiologic technician	Doctor's experience (work experience, poster, scientific publication, conference)	Pneumology
5		Other healthcare professional		Cardiology
6		Istituto di Ricerca Medica		Ginecology
7		Medical research institute		Neurology
8		Science faculty student		FAST
9		Patient		Other types of ultrasound
10		Caregiver		Other (e.g. sale of US devices)
11		Influencer
12		Shop/company
13		Patient association page
14		Medical/hosputal information page
15		Publisher/magazine/journalist/TV
16		Medical/physiotherapy office, clinic etc.

## Sheet: JAMAS
Characteristics	Details	Score (No 0, Yes 1)	JAMAS_score1_4
Authorship	Affiliation or role of the video creator (states to be a doctor, patient, etc., or it can be inferred from the description only). Write "no" if it must be deduced from the profile.	1	3
Attribution	Cite bibliography and sources, copyright	0
Currency	Timeliness of information and updates (always yes, since the publication date is available on YouTube)	1		Always yes
Disclosure	Commercial disclosure or clear statement of selling something, conflicts of interest	1		Select yes if they are not selling anything and have no conflicts of interest.

## Sheet: PEMAT
Item	Understandability and actionability	No 0, Yes 1
1	The video clearly fulfills its intended purpose (educational/experiential/entertainment/promotional, etc.).	1			YES	NO	YES	Score	Pemat %
2	The video uses plain, conversational language.	1		PEMAT U	10	2	0	1000	83.33
3	Medical terms, if used, are introduced only to familiarize users and are explained when mentioned (if not used, enter 1)	1		PEMAT A	3	1	0	300	75
4	The speaker is the video’s author, not a recorded voice or background music.	1
5	The content includes pauses between sections or is divided into subsections (camera cuts are also valid) (NA if < 1 min)	1
6	The video sections contain informative subtitles (also NA if < 1 min)	0
7	The material is presented in a logical sequence (beginning → end, statement → conclusion, etc.)	1
8	The material includes a summary (also NA if < 1 min)	0
9	The text on the screen is easy to read (no text: NA)	1
10	The spoken words are clear (not too fast, etc.; narration/music only: NA)	1
11	Clear and well-organized illustrations and photographs (no visual aids: NA)	1
12	The tables are simple and clear (no tables: NA)	1		PEMAT U			PEMAT A		Totale
13	Presence of at least one action that the user can take after watching the video (e.g., interact, answer a question, get inspired, buy something, be more cautious, share the challenge, etc.)	1		Assessable (YES+ NO)			Assessable (YES + NO)		Assessable(YES + NO)
14	The video addresses the viewer directly (e.g., "buy this," "be careful," "comment," "help me," etc.)	1		12			4		0
15	The video breaks down each action into manageable and explicit steps.	1		100
16	The video explains in detail the diagrams, charts, and tables used to suggest actions (e.g., clearly specifying what the suggested nutritional values mean, etc.) (NA if no tables/charts/diagrams are used).	0
		Remember: do not leave any field empty
		85

## Sheet: mDISCERN
1	Clarity of objectives	How clearly are the objectives of the information specified?
2	Achievement of objectives	To what extent do you think the information achieved its intended objectives?
3	Relevance to patients	How relevant is the information to patients?
4	Sources	How reliable do you consider the sources?
5	Timeliness of information	How recent is the information?	5p (2024-2023-2022)	4p (2021-2020-2019)	3p (2018-2017-2016)	2p (2015-2014-2013)	1p (2012-2011-2010)
6	Bias and balance	How unbiased and balanced is the information?
7	Additional sources	How useful are the additional sources of information provided?
8	Areas of uncertainty	How well does the information address areas of uncertainty in the field?
9	Procedure explanation	How clearly is the proposed procedure explained?
10	Benefits of the procedure	How clearly are the benefits of undergoing the procedure communicated?
11	Risks of the procedure	How well are the risks associated with the procedure discussed?
12	Non-procedure options	How well are the options of not undergoing the procedure explored?
13	Quality of life	How much does the procedure impact the patient’s quality of life?
14	Alternative procedures	How well are other alternative options presented and discussed?
15	Shared decision-making	How well does the information support the patient-provider shared decision-making process?
16	Overall evaluation	Considering all the above points, rate the overall quality of the information.
	Assign a score from 1 to 5 for each ITEM on the scale.
	Sum the individual scores.
	Calculate the average of the summed scores:	4.1–5 → The information is of high quality, providing a balanced and comprehensive analysis of treatments. It includes reliable and up-to-date sources and is extremely useful in supporting informed decision-making.
		3.1–4 → The information is generally reliable and useful, with some room for improvement. It shows a good degree of balance and completeness but may lack details in certain areas or benefit from an update.
		2.1–3 → The information has shortcomings in terms of reliability, balance, or completeness. While some aspects may be well addressed, others require significant improvement to effectively support decision-making.
		1.1–2 → The information is often incomplete, unbalanced, or based on unreliable sources. It has significant gaps that hinder its ability to support informed decisions effectively.
		0–1 → The information is of low quality, with major deficiencies in reliability, balance, completeness, and usefulness. It requires substantial revision to be considered trustworthy.
